# Supplementary material for: Structural basis of Nipah virus RNA synthesis
Source: Nat Commun. 2025 Mar 6;16:2261. doi: 10.1038/s41467-025-57219-5 (PMC11885841; doi:10.1038/s41467-025-57219-5)
Supplement: Supplementary file 4 — Source Data [file 41467_2025_57219_MOESM4_ESM.xlsx]

## Sheet: Supplementary Fig. 1a
Elution Volumn (mL)	Absorbance 280 nm (mAu)		Elution Volumn (mL)	Absorbance 260 nm (mAu)
0.0064	-1.57999		0.00457	-8.57653
0.01307	-1.58471		0.00874	-8.39993
0.01973	-1.56692		0.01291	-8.20798
0.0264	-1.53317		0.01707	-8.08122
0.03307	-1.43325		0.02124	-7.97073
0.03973	-1.34699		0.02541	-7.91187
0.04639	-1.25165		0.02957	-7.88335
0.05306	-1.19434		0.03374	-7.862
0.05972	-1.1698		0.0379	-7.9593
0.06639	-1.18269		0.04207	-8.11131
0.07305	-1.19369		0.04623	-8.2831
0.07972	-1.18753		0.0504	-8.43182
0.08639	-1.20552		0.05456	-8.51434
0.09305	-1.19827		0.05873	-8.42579
0.09972	-1.18413		0.0629	-8.30292
0.10638	-1.1808		0.06706	-8.16143
0.11304	-1.2186		0.07123	-8.03704
0.11971	-1.27154		0.07539	-7.92823
0.12638	-1.30049		0.07956	-7.81863
0.13304	-1.36247		0.08373	-7.6845
0.13971	-1.45208		0.08789	-7.60084
0.14638	-1.48855		0.09206	-7.5492
0.15304	-1.4883		0.09622	-7.52566
0.15971	-1.42693		0.10039	-7.52896
0.16637	-1.37343		0.10455	-7.5353
0.17303	-1.28175		0.10872	-7.52299
0.1797	-1.20333		0.11288	-7.5756
0.18636	-1.11545		0.11705	-7.65572
0.19303	-1.06085		0.12122	-7.72111
0.1997	-1.0338		0.12538	-7.82261
0.20636	-1.07889		0.12955	-7.97497
0.21303	-1.17922		0.13371	-8.01731
0.2197	-1.26523		0.13788	-8.0174
0.22636	-1.3293		0.14204	-7.99664
0.23302	-1.35024		0.14621	-7.89855
0.23969	-1.35684		0.15038	-7.7398
0.24635	-1.36328		0.15455	-7.6232
0.25302	-1.37939		0.15871	-7.54774
0.25969	-1.37535		0.16288	-7.52003
0.26635	-1.35758		0.16705	-7.57761
0.27302	-1.35794		0.17121	-7.62322
0.27968	-1.33734		0.17538	-7.65584
0.28635	-1.29249		0.17954	-7.74211
0.29301	-1.22351		0.18371	-7.84043
0.29968	-1.17301		0.18787	-7.89895
0.30634	-1.09486		0.19204	-7.97697
0.31301	-1.07868		0.1962	-8.00938
0.31967	-1.12548		0.20037	-7.95124
0.32634	-1.21463		0.20454	-7.83845
0.33301	-1.28371		0.2087	-7.72106
0.33967	-1.29164		0.21287	-7.61062
0.34634	-1.30648		0.21703	-7.50438
0.353	-1.28479		0.2212	-7.41984
0.35966	-1.24146		0.22536	-7.38597
0.36633	-1.18925		0.22953	-7.34457
0.37299	-1.17248		0.2337	-7.32859
0.37966	-1.15217		0.23786	-7.39353
0.38633	-1.11314		0.24203	-7.45349
0.39299	-1.07749		0.24619	-7.55541
0.39966	-1.05755		0.25036	-7.69668
0.40633	-1.05753		0.25452	-7.77324
0.41299	-1.00841		0.25869	-7.73964
0.41965	-1.01201		0.26286	-7.70106
0.42632	-1.02975		0.26702	-7.54066
0.43298	-1.09798		0.27119	-7.37457
0.43965	-1.09426		0.27535	-7.28082
0.44632	-1.11286		0.27952	-7.24549
0.45298	-1.1296		0.28368	-7.22552
0.45965	-1.14639		0.28786	-7.25733
0.46631	-1.16338		0.29202	-7.30672
0.47298	-1.174		0.29619	-7.44769
0.47964	-1.21797		0.30035	-7.58591
0.48631	-1.27909		0.30452	-7.72088
0.49297	-1.31277		0.30868	-7.80172
0.49964	-1.30682		0.31285	-7.86988
0.5063	-1.24775		0.31702	-7.80761
0.51297	-1.20427		0.32118	-7.72902
0.51964	-1.15592		0.32535	-7.60662
0.5263	-1.15275		0.32951	-7.56642
0.53297	-1.14267		0.33368	-7.53004
0.53963	-1.12505		0.33785	-7.5236
0.5463	-1.08821		0.34201	-7.53316
0.55296	-1.05756		0.34618	-7.58868
0.55962	-1.0448		0.35034	-7.59477
0.56629	-1.04716		0.35451	-7.55828
0.57296	-1.05063		0.35867	-7.45691
0.57962	-1.0441		0.36284	-7.35537
0.58629	-1.03037		0.367	-7.31126
0.59296	-1.00546		0.37117	-7.31384
0.59962	-1.02035		0.37534	-7.28539
0.60628	-1.10317		0.3795	-7.23145
0.61295	-1.20866		0.38367	-7.18547
0.61961	-1.27029		0.38783	-7.07823
0.62628	-1.24615		0.392	-6.99351
0.63295	-1.20267		0.39616	-7.11316
0.63961	-1.208		0.40033	-7.32677
0.64628	-1.20943		0.40449	-7.55607
0.65294	-1.13692		0.40866	-7.78119
0.65961	-1.06998		0.41283	-7.87852
0.66627	-1.00121		0.41699	-7.82696
0.67294	-1.02145		0.42116	-7.70439
0.6796	-0.997		0.42533	-7.50008
0.68627	-1.03016		0.4295	-7.3149
0.69293	-1.06348		0.43366	-7.17812
0.6996	-1.13087		0.43783	-7.05164
0.70627	-1.20909		0.44199	-6.96046
0.71293	-1.24454		0.44616	-6.91281
0.7196	-1.27818		0.45032	-6.84585
0.72626	-1.28117		0.45449	-6.79299
0.73293	-1.25105		0.45866	-6.74284
0.73959	-1.22652		0.46282	-6.77627
0.74625	-1.25177		0.46699	-6.86265
0.75292	-1.27583		0.47115	-6.98801
0.75959	-1.2564		0.47532	-7.15514
0.76625	-1.18531		0.47948	-7.33619
0.77292	-1.14323		0.48365	-7.44905
0.77959	-1.07587		0.48782	-7.4851
0.78625	-1.04751		0.49198	-7.43463
0.79292	-1.06239		0.49615	-7.29154
0.79958	-1.1579		0.50031	-7.17729
0.80624	-1.24691		0.50448	-7.03657
0.81291	-1.26379		0.50864	-6.85471
0.81958	-1.22598		0.51281	-6.78113
0.82624	-1.19357		0.51698	-6.76414
0.83291	-1.21986		0.52114	-6.69658
0.83957	-1.2677		0.52531	-6.7111
0.84624	-1.2842		0.52947	-6.93263
0.85291	-1.27693		0.53364	-7.09869
0.85957	-1.26329		0.5378	-7.25738
0.86623	-1.21632		0.54197	-7.35194
0.8729	-1.17314		0.54613	-7.36524
0.87956	-1.14368		0.5503	-7.21729
0.88623	-1.13783		0.55447	-7.03406
0.8929	-1.09478		0.55863	-6.90372
0.89956	-1.04568		0.5628	-6.84376
0.90623	-1.0305		0.56697	-6.849
0.91289	-1.09215		0.57114	-6.85007
0.91956	-1.11624		0.5753	-6.84559
0.92622	-1.11915		0.57947	-6.83467
0.93288	-1.10981		0.58363	-6.82754
0.93955	-1.12288		0.5878	-6.75703
0.94622	-1.1702		0.59197	-6.72221
0.95288	-1.21733		0.59613	-6.76425
0.95955	-1.28742		0.6003	-6.78162
0.96622	-1.36352		0.60446	-6.75814
0.97288	-1.38984		0.60863	-6.81719
0.97955	-1.3279		0.61279	-6.93184
0.98621	-1.26157		0.61696	-7.02692
0.99287	-1.25744		0.62112	-7.12572
0.99954	-1.33107		0.62529	-7.25363
1.00621	-1.33547		0.62946	-7.25717
1.01287	-1.26942		0.63362	-7.20971
1.01954	-1.20065		0.63779	-7.15934
1.02621	-1.12166		0.64195	-7.11575
1.03287	-1.11454		0.64612	-6.94816
1.03954	-1.10969		0.65028	-6.8017
1.0462	-1.18661		0.65445	-6.74015
1.05286	-1.20004		0.65861	-6.67393
1.05953	-1.19417		0.66278	-6.58791
1.06619	-1.17403		0.66695	-6.64989
1.07286	-1.18404		0.67111	-6.84586
1.07953	-1.19596		0.67528	-7.05013
1.08619	-1.2025		0.67944	-7.24488
1.09286	-1.21289		0.68361	-7.39575
1.09953	-1.208		0.68778	-7.46866
1.10619	-1.22653		0.69194	-7.37875
1.11285	-1.32901		0.69611	-7.18605
1.11952	-1.40244		0.70028	-6.97893
1.12618	-1.43346		0.70444	-6.8467
1.13285	-1.39252		0.70861	-6.79677
1.13951	-1.38534		0.71278	-6.87676
1.14618	-1.34612		0.71694	-7.05501
1.15285	-1.27261		0.72111	-7.2147
1.15951	-1.18522		0.72527	-7.35995
1.16618	-1.10519		0.72944	-7.44945
1.17284	-1.08074		0.7336	-7.42812
1.1795	-1.0907		0.73777	-7.30069
1.18617	-1.16678		0.74194	-7.1971
1.19284	-1.23132		0.7461	-7.12337
1.1995	-1.32824		0.75027	-6.96151
1.20617	-1.38649		0.75443	-6.83663
1.21284	-1.38374		0.7586	-6.78337
1.2195	-1.34116		0.76276	-6.77247
1.22617	-1.35061		0.76693	-6.82239
1.23283	-1.3721		0.7711	-7.02908
1.23949	-1.34709		0.77526	-7.32222
1.24616	-1.27954		0.77943	-7.55324
1.25282	-1.24926		0.78359	-7.7777
1.25949	-1.22147		0.78776	-7.87358
1.26616	-1.17242		0.79192	-7.7925
1.27282	-1.15023		0.79609	-7.62769
1.27949	-1.19288		0.80026	-7.46319
1.28616	-1.27206		0.80442	-7.24518
1.29282	-1.34466		0.80859	-7.03727
1.29948	-1.40003		0.81275	-6.96671
1.30615	-1.40207		0.81692	-6.97703
1.31281	-1.31146		0.82108	-7.03612
1.31948	-1.24688		0.82525	-7.10163
1.32614	-1.25399		0.82941	-7.24246
1.33281	-1.30571		0.83359	-7.41789
1.33948	-1.27943		0.83775	-7.59491
1.34614	-1.25473		0.84192	-7.74184
1.35281	-1.21308		0.84609	-7.85272
1.35947	-1.18611		0.85025	-7.80723
1.36614	-1.1547		0.85442	-7.72471
1.3728	-1.1376		0.85858	-7.57357
1.37947	-1.17736		0.86275	-7.44615
1.38613	-1.19339		0.86691	-7.34294
1.3928	-1.20925		0.87108	-7.32535
1.39947	-1.19383		0.87524	-7.27941
1.40613	-1.21951		0.87941	-7.31155
1.4128	-1.24284		0.88358	-7.46946
1.41946	-1.28714		0.88774	-7.67489
1.42612	-1.30986		0.89191	-7.88059
1.43279	-1.3227		0.89607	-8.02479
1.43945	-1.28428		0.90024	-8.04627
1.44612	-1.26926		0.9044	-7.89433
1.45279	-1.26263		0.90857	-7.70585
1.45945	-1.29454		0.91273	-7.51832
1.46612	-1.30424		0.9169	-7.42053
1.47279	-1.29126		0.92107	-7.36625
1.47945	-1.29469		0.92523	-7.37665
1.48611	-1.29468		0.9294	-7.39622
1.49278	-1.31107		0.93356	-7.39563
1.49944	-1.33497		0.93773	-7.38879
1.50611	-1.37129		0.9419	-7.44463
1.51277	-1.4487		0.94606	-7.47447
1.51944	-1.53103		0.95023	-7.50228
1.52611	-1.57252		0.95439	-7.51693
1.53277	-1.53247		0.95856	-7.55658
1.53944	-1.44173		0.96272	-7.62454
1.5461	-1.38097		0.96689	-7.69769
1.55277	-1.36877		0.97106	-7.7718
1.55943	-1.34911		0.97523	-7.88948
1.5661	-1.25824		0.97939	-7.92943
1.57276	-1.15476		0.98356	-7.85633
1.57943	-1.11738		0.98772	-7.75428
1.5861	-1.13155		0.99189	-7.69999
1.59276	-1.19361		0.99606	-7.68279
1.59943	-1.2387		1.00022	-7.668
1.60609	-1.2633		1.00439	-7.60813
1.61276	-1.28405		1.00855	-7.58965
1.61942	-1.29575		1.01272	-7.64777
1.62608	-1.31268		1.01688	-7.73788
1.63275	-1.3568		1.02105	-7.89226
1.63942	-1.40877		1.02522	-8.13425
1.64608	-1.44487		1.02938	-8.36099
1.65275	-1.4247		1.03355	-8.47808
1.65942	-1.41026		1.03771	-8.38482
1.66608	-1.39283		1.04188	-8.3075
1.67274	-1.3468		1.04604	-8.16762
1.67941	-1.24882		1.05021	-7.99127
1.68607	-1.15131		1.05438	-7.85565
1.69274	-1.13166		1.05854	-7.88055
1.6994	-1.14828		1.06271	-7.85195
1.70607	-1.20739		1.06687	-7.83919
1.71274	-1.26603		1.07104	-7.92441
1.7194	-1.3001		1.0752	-7.95894
1.72607	-1.31775		1.07937	-7.93575
1.73273	-1.33936		1.08353	-7.95343
1.7394	-1.36344		1.0877	-7.99866
1.74606	-1.36452		1.09187	-7.93936
1.75273	-1.33286		1.09603	-7.95146
1.75939	-1.34562		1.1002	-8.03445
1.76606	-1.35121		1.10436	-8.13337
1.77273	-1.32697		1.10854	-8.22642
1.77939	-1.24832		1.1127	-8.29152
1.78606	-1.19768		1.11687	-8.31383
1.79272	-1.19601		1.12103	-8.28185
1.79939	-2.15035		1.1252	-8.16003
1.80605	-2.20916		1.12936	-8.03473
1.81271	-2.17941		1.13353	-8.01703
1.81938	-2.19972		1.1377	-7.97274
1.82605	-2.19291		1.14186	-7.95334
1.83271	-2.19192		1.14603	-7.97984
1.83938	-2.22771		1.15019	-8.0175
1.84605	-2.257		1.15436	-8.01876
1.85271	-2.29377		1.15852	-8.13597
1.85938	-2.22252		1.16269	-8.21559
1.86604	-2.20413		1.16685	-8.41063
1.8727	-2.10973		1.17102	-8.53867
1.87937	-1.9862		1.17519	-8.5962
1.88604	-1.78334		1.17935	-8.53634
1.8927	-1.62182		1.18352	-8.53169
1.89937	-1.58073		1.18768	-8.43142
1.90603	-1.56389		1.19185	-8.42627
1.9127	-1.49421		1.19601	-8.44639
1.91936	-1.36175		1.20018	-8.52063
1.92603	-1.24422		1.20435	-8.56608
1.93269	-1.16079		1.20851	-8.58866
1.93936	-1.08518		1.21268	-8.53096
1.94602	-1.00244		1.21684	-8.50094
1.95269	-1.00689		1.22101	-8.4928
1.95936	-1.05059		1.22517	-8.51907
1.96602	-1.10033		1.22934	-8.48968
1.97269	-1.0941		1.23351	-8.42121
1.97935	-1.0754		1.23767	-8.35931
1.98602	-1.0658		1.24184	-8.27145
1.99268	-0.99275		1.24601	-8.15561
1.99934	-0.86682		1.25017	-8.2302
2.00601	-0.7027		1.25434	-8.42331
2.01268	-0.589		1.25851	-8.57259
2.01934	-0.48346		1.26267	-8.71959
2.02601	-0.42685		1.26684	-8.83172
2.03268	-0.424		1.271	-8.80779
2.03934	-0.48476		1.27517	-8.74879
2.04601	-0.54256		1.27934	-8.74733
2.05267	-0.65753		1.2835	-8.68932
2.05933	-0.70998		1.28767	-8.67703
2.066	-0.70883		1.29183	-8.65391
2.07267	-0.66889		1.296	-8.66606
2.07933	-0.65319		1.30016	-8.68713
2.086	-0.67359		1.30433	-8.73601
2.09266	-0.67441		1.3085	-8.76328
2.09933	-0.63623		1.31266	-8.7819
2.106	-0.55447		1.31683	-8.77142
2.11266	-0.43738		1.32099	-8.73602
2.11932	-0.3768		1.32516	-8.72099
2.12599	-0.38539		1.32932	-8.61407
2.13265	-0.40368		1.33349	-8.55647
2.13932	-0.44004		1.33765	-8.50976
2.14599	-0.4631		1.34182	-8.47318
2.15265	-0.53809		1.34598	-8.5454
2.15932	-0.56258		1.35015	-8.73996
2.16598	-0.62037		1.35432	-8.92573
2.17265	-0.70608		1.35848	-9.05634
2.17931	-0.74375		1.36265	-9.13788
2.18597	-0.7497		1.36681	-9.09138
2.19264	-0.73798		1.37098	-8.9792
2.19931	-0.73391		1.37515	-8.88855
2.20597	-0.71607		1.37931	-8.83136
2.21264	-0.63291		1.38348	-8.78677
2.21931	-0.59528		1.38765	-8.75289
2.22597	-0.53436		1.39182	-8.73199
2.23264	-0.51644		1.39598	-8.70258
2.2393	-0.52704		1.40015	-8.66782
2.24596	-0.56821		1.40431	-8.65602
2.25263	-0.63031		1.40848	-8.61701
2.2593	-0.68153		1.41264	-8.60395
2.26596	-0.73472		1.41681	-8.60081
2.27263	-0.76689		1.42097	-8.58853
2.27929	-0.80882		1.42514	-8.52812
2.28596	-0.81816		1.42931	-8.54003
2.29263	-0.81382		1.43347	-8.53002
2.29929	-0.79311		1.43764	-8.48012
2.30595	-0.82476		1.4418	-8.46582
2.31262	-0.92343		1.44597	-8.50816
2.31928	-0.97823		1.45013	-8.51845
2.32595	-0.98877		1.4543	-8.51336
2.33262	-0.99128		1.45847	-8.50797
2.33928	-0.9428		1.46263	-8.52898
2.34595	-0.89892		1.4668	-8.53763
2.35262	-0.81943		1.47096	-8.53863
2.35928	-0.7995		1.47513	-8.55122
2.36594	-0.75104		1.47929	-8.61203
2.3726	-0.7395		1.48346	-8.62476
2.37927	-0.7892		1.48763	-8.60659
2.38594	-0.87725		1.49179	-8.60587
2.3926	-0.97166		1.49596	-8.67743
2.39927	-0.97826		1.50012	-8.74386
2.40594	-1.0053		1.50429	-8.80853
2.4126	-0.9953		1.50845	-8.90576
2.41927	-1.03796		1.51262	-8.98766
2.42593	-1.0386		1.51678	-8.99234
2.43259	-1.02745		1.52096	-8.97187
2.43926	-0.98307		1.52512	-8.90282
2.44593	-1.01775		1.52929	-8.7644
2.45259	-1.00073		1.53345	-8.68809
2.45926	-0.95147		1.53762	-8.64503
2.46592	-0.84985		1.54179	-8.59327
2.47259	-0.79882		1.54595	-8.59865
2.47926	-0.77355		1.55012	-8.59655
2.48592	-0.79006		1.55428	-8.60883
2.49258	-0.82472		1.55845	-8.68172
2.49925	-0.89455		1.56261	-8.73205
2.50591	-0.95592		1.56678	-8.77156
2.51258	-0.95281		1.57095	-8.82634
2.51925	-0.95354		1.57511	-8.79301
2.52591	-0.92038		1.57928	-8.67755
2.53258	-0.94858		1.58344	-8.59595
2.53925	-1.02058		1.58761	-8.55294
2.54591	-1.10376		1.59177	-8.56562
2.55257	-1.13939		1.59594	-8.54599
2.55924	-1.1271		1.6001	-8.47113
2.5659	-1.07835		1.60427	-8.40703
2.57257	-1.02159		1.60844	-8.35205
2.57923	-0.90946		1.6126	-8.2903
2.5859	-0.85227		1.61677	-8.23816
2.59257	-0.78577		1.62093	-8.28658
2.59923	-0.80121		1.6251	-8.35103
2.6059	-0.79457		1.62926	-8.41892
2.61256	-0.8319		1.63343	-8.54266
2.61923	-0.86101		1.6376	-8.73327
2.62589	-0.92281		1.64176	-8.85142
2.63256	-0.98841		1.64593	-8.89861
2.63922	-1.03623		1.65009	-8.81023
2.64589	-1.0705		1.65427	-8.64147
2.65256	-1.05768		1.65843	-8.44638
2.65922	-1.0675		1.6626	-8.29676
2.66589	-1.09191		1.66676	-8.14445
2.67255	-1.10802		1.67093	-8.09906
2.67921	-1.10294		1.67509	-8.14929
2.68588	-1.09568		1.67926	-8.35634
2.69254	-1.12167		1.68343	-8.56791
2.69921	-1.11933		1.68759	-8.73849
2.70588	-1.06124		1.69176	-8.87807
2.71254	-0.99902		1.69592	-8.88651
2.71921	-0.94181		1.70009	-8.75988
2.72588	-0.89611		1.70425	-8.62277
2.73254	-0.85737		1.70842	-8.53257
2.7392	-0.8597		1.71258	-8.43664
2.74587	-0.92775		1.71675	-8.38991
2.75253	-0.96921		1.72092	-8.35618
2.7592	-1.04772		1.72508	-8.33479
2.76586	-1.04294		1.72925	-8.3877
2.77253	-1.10165		1.73341	-8.45403
2.7792	-1.15368		1.73758	-8.51731
2.78586	-1.21801		1.74175	-8.54697
2.79253	-1.21115		1.74591	-8.46528
2.79919	-1.19362		1.75008	-8.39154
2.80586	-1.17936		1.75424	-8.38632
2.81252	-1.1464		1.75841	-8.36942
2.81919	-1.06026		1.76257	-8.26609
2.82585	-1.03092		1.76674	-8.1769
2.83252	-1.06476		1.7709	-8.03814
2.83919	-1.06841		1.77507	-7.96238
2.84585	-0.99951		1.77924	-7.99447
2.85252	-0.90597		1.7834	-8.17153
2.85918	-0.9264		1.78757	-8.45422
2.86585	-1.00706		1.79174	-8.69453
2.87251	-1.06418		1.79591	-8.71512
2.87917	-1.10078		1.80007	-7.01631
2.88584	-1.13357		1.80424	-7.10649
2.89251	-1.17795		1.8084	-7.27653
2.89917	-1.21392		1.81257	-7.4247
2.90584	-1.19254		1.81673	-7.58766
2.91251	-1.13678		1.8209	-7.63493
2.91917	-1.06275		1.82507	-7.52019
2.92583	-0.97677		1.82923	-7.33876
2.9325	-0.94093		1.8334	-7.22706
2.93916	-0.89136		1.83756	-7.13912
2.94583	-0.8709		1.84173	-7.09075
2.95249	-0.89092		1.84589	-7.06894
2.95916	-0.97053		1.85006	-7.08852
2.96583	-1.06139		1.85423	-7.1196
2.97249	-1.08754		1.85839	-7.12682
2.97916	-1.12884		1.86256	-7.16893
2.98582	-1.18253		1.86672	-7.28844
2.99249	-1.22484		1.87089	-7.40901
2.99915	-1.20176		1.87505	-7.47351
3.00582	-1.20472		1.87922	-7.48651
3.01248	-1.21989		1.88338	-7.44674
3.01915	-1.20646		1.88755	-7.32963
3.02582	-1.09513		1.89172	-7.19621
3.03248	-0.97223		1.89588	-7.07552
3.03915	-0.87028		1.90005	-7.03455
3.04581	-0.83929		1.90421	-7.03615
3.05248	-0.82365		1.90838	-7.00577
3.05914	-0.85857		1.91254	-6.97604
3.0658	-0.91971		1.91671	-6.94695
3.07247	-0.94487		1.92088	-6.93146
3.07914	-1.00655		1.92504	-6.98475
3.0858	-1.10373		1.92921	-7.10179
3.09247	-1.1989		1.93338	-7.21899
3.09914	-1.20954		1.93755	-7.3365
3.1058	-1.16219		1.94171	-7.36413
3.11247	-1.09986		1.94588	-7.27349
3.11913	-1.0806		1.95004	-7.13617
3.12579	-1.05445		1.95421	-6.97553
3.13246	-1.03677		1.95837	-6.82788
3.13912	-0.95256		1.96254	-6.73781
3.14579	-0.84876		1.9667	-6.69744
3.15246	-0.73867		1.97087	-6.68353
3.15912	-0.7144		1.97504	-6.66844
3.16579	-0.7366		1.9792	-6.64773
3.17246	-0.77968		1.98337	-6.62582
3.17912	-0.796		1.98753	-6.57614
3.18578	-0.85802		1.9917	-6.52594
3.19245	-0.91736		1.99587	-6.48998
3.19911	-0.9858		2.00003	-6.43233
3.20578	-0.97144		2.0042	-6.36821
3.21245	-1.00167		2.00836	-6.31047
3.21911	-1.03211		2.01253	-6.22897
3.22578	-1.06825		2.01669	-6.12083
3.23244	-1.04106		2.02086	-6.01559
3.23911	-1.02769		2.02502	-5.9318
3.24577	-1.10434		2.02919	-5.94562
3.25243	-1.10165		2.03336	-6.03517
3.2591	-1.01803		2.03752	-6.14819
3.26577	-0.91296		2.04169	-6.27869
3.27243	-0.888		2.04585	-6.39601
3.2791	-0.95191		2.05002	-6.45119
3.28577	-0.97919		2.05418	-6.45528
3.29243	-1.01242		2.05835	-6.46621
3.2991	-0.98544		2.06251	-6.44867
3.30576	-0.98584		2.06669	-6.38757
3.31242	-0.99586		2.07085	-6.2902
3.31909	-0.99514		2.07502	-6.20312
3.32575	-0.9943		2.07919	-6.1694
3.33242	-0.99603		2.08335	-6.19047
3.33909	-1.00726		2.08752	-6.24187
3.34575	-1.0104		2.09168	-6.29919
3.35242	-1.04862		2.09585	-6.34816
3.35909	-1.11942		2.10001	-6.35032
3.36575	-1.17307		2.10418	-6.3695
3.37241	-1.19588		2.10835	-6.46354
3.37908	-1.15369		2.11251	-6.59877
3.38574	-1.08973		2.11668	-6.72877
3.39241	-1.02732		2.12084	-6.84435
3.39908	-1.13808		2.12501	-6.86995
3.40574	-1.1464		2.12917	-6.80487
3.41241	-1.14255		2.13334	-6.69241
3.41907	-1.03328		2.1375	-6.59543
3.42574	-0.98515		2.14167	-6.49574
3.4324	-0.916		2.14584	-6.45473
3.43906	-0.88437		2.15	-6.47275
3.44573	-0.87785		2.15417	-6.52709
3.4524	-0.93987		2.15833	-6.59511
3.45906	-0.93267		2.1625	-6.71649
3.46573	-0.92323		2.16666	-6.8434
3.4724	-0.90986		2.17083	-6.92838
3.47906	-0.9251		2.175	-6.96466
3.48573	-0.96798		2.17916	-6.9554
3.49239	-0.98306		2.18333	-6.86263
3.49905	-0.99426		2.18749	-6.72036
3.50572	-1.04303		2.19166	-6.62673
3.51239	-1.1074		2.19582	-6.57556
3.51905	-1.13502		2.19999	-6.54802
3.52572	-1.09618		2.20416	-6.57792
3.53238	-1.07046		2.20833	-6.62115
3.53905	-1.01898		2.21249	-6.63284
3.54572	-0.95422		2.21666	-6.75271
3.55238	-0.87468		2.22082	-6.94424
3.55904	-0.86858		2.22499	-7.11367
3.56571	-0.88508		2.22916	-7.28785
3.57237	-0.86684		2.23332	-7.37149
3.57904	-0.78816		2.23749	-7.24936
3.58571	-0.7764		2.24165	-7.05546
3.59237	-0.78282		2.24582	-6.90694
3.59904	-0.81994		2.24999	-6.79265
3.60571	-0.79243		2.25415	-6.75433
3.61237	-0.76777		2.25832	-6.79233
3.61903	-0.7837		2.26248	-6.8351
3.62569	-0.79137		2.26665	-6.87015
3.63236	-0.81352		2.27081	-6.89429
3.63903	-0.81627		2.27498	-6.93535
3.64569	-0.89425		2.27914	-6.96669
3.65236	-1.03056		2.28331	-7.02464
3.65903	-1.12666		2.28748	-7.0999
3.66569	-1.11002		2.29164	-7.17443
3.67236	-1.03399		2.29581	-7.22622
3.67902	-0.9427		2.29997	-7.33352
3.68568	-0.87683		2.30414	-7.46035
3.69235	-0.78854		2.3083	-7.58006
3.69902	-0.75396		2.31247	-7.6824
3.70568	-0.78188		2.31663	-7.77375
3.71235	-0.82506		2.3208	-7.73082
3.71901	-0.82388		2.32497	-7.5907
3.72568	-0.80054		2.32913	-7.44991
3.73235	-0.75639		2.3333	-7.33014
3.73901	-0.71381		2.33746	-7.23444
3.74567	-0.70088		2.34164	-7.21932
3.75234	-0.74365		2.3458	-7.25871
3.759	-0.75371		2.34997	-7.35823
3.76567	-0.8079		2.35413	-7.51097
3.77234	-0.87643		2.3583	-7.6814
3.779	-0.94701		2.36247	-7.84487
3.78567	-0.96749		2.36663	-7.93478
3.79234	-0.93879		2.3708	-7.90768
3.799	-0.88071		2.37496	-7.81544
3.80566	-0.91709		2.37913	-7.68035
3.81233	-0.83728		2.38329	-7.54412
3.81899	-0.83522		2.38746	-7.48651
3.82566	-0.78813		2.39162	-7.45932
3.83232	-0.78984		2.39579	-7.41465
3.83899	-0.76932		2.39996	-7.37648
3.84566	-0.76939		2.40412	-7.35824
3.85232	-0.7636		2.40829	-7.36103
3.85899	-0.81093		2.41245	-7.42162
3.86565	-0.83031		2.41662	-7.53903
3.87231	-0.9463		2.42078	-7.69791
3.87898	-1.03875		2.42495	-7.85192
3.88565	-1.0706		2.42912	-7.93499
3.89231	-0.99048		2.43328	-7.92489
3.89898	-0.88752		2.43745	-7.83403
3.90564	-0.83595		2.44161	-7.72986
3.91231	-0.85115		2.44578	-7.66045
3.91898	-0.84182		2.44994	-7.63468
3.92564	-0.8032		2.45411	-7.63417
3.9323	-0.74782		2.45828	-7.65039
3.93897	-0.76974		2.46244	-7.66697
3.94563	-0.76596		2.46661	-7.69834
3.9523	-0.73207		2.47077	-7.77595
3.95897	-0.67934		2.47494	-7.89478
3.96563	-0.72617		2.47911	-8.06458
3.9723	-0.79571		2.48328	-8.18351
3.97897	-0.85711		2.48744	-8.17261
3.98563	-0.85269		2.49161	-8.07001
3.99229	-0.87152		2.49577	-7.93782
3.99896	-0.87161		2.49994	-7.77784
4.00562	-0.84699		2.50411	-7.64687
4.01229	-0.86288		2.50827	-7.6103
4.01895	-0.96344		2.51244	-7.63843
4.02562	-1.06297		2.5166	-7.69084
4.03229	-1.08159		2.52077	-7.76424
4.03895	-1.04092		2.52493	-7.83944
4.04562	-1.00245		2.5291	-7.92786
4.05228	-0.98863		2.53326	-8.05416
4.05895	-0.96329		2.53743	-8.15893
4.06561	-0.89507		2.5416	-8.22518
4.07228	-0.87147		2.54576	-8.25434
4.07894	-0.8379		2.54993	-8.21072
4.08561	-0.86995		2.55409	-8.11438
4.09227	-0.87		2.55826	-8.02344
4.09894	-0.87512		2.56242	-7.91843
4.10561	-0.8927		2.56659	-7.861
4.11227	-0.86921		2.57075	-7.8469
4.11894	-0.85988		2.57492	-7.85012
4.1256	-0.80452		2.57909	-7.91843
4.13226	-0.80461		2.58325	-8.0613
4.13893	-0.80587		2.58742	-8.19078
4.1456	-0.84668		2.59158	-8.31911
4.15226	-0.87605		2.59575	-8.41753
4.15893	-0.93747		2.59992	-8.42013
4.1656	-0.99186		2.60408	-8.36928
4.17226	-1.04165		2.60825	-8.32155
4.17893	-1.04943		2.61242	-8.26889
4.18559	-1.01082		2.61659	-8.20317
4.19225	-0.96153		2.62075	-8.11968
4.19892	-0.88371		2.62492	-8.05139
4.20558	-0.84558		2.62908	-8.00546
4.21225	-0.77406		2.63325	-7.94622
4.21892	-0.74001		2.63741	-7.89177
4.22558	-0.73357		2.64158	-7.89728
4.23225	-0.80915		2.64574	-7.91221
4.23891	-0.858		2.64991	-7.94226
4.24558	-0.95634		2.65408	-8.01924
4.25224	-1.02665		2.65824	-8.13506
4.25891	-1.10476		2.66241	-8.29298
4.26557	-1.11193		2.66657	-8.45028
4.27224	-1.07283		2.67074	-8.55408
4.2789	-1.07108		2.6749	-8.56294
4.28557	-1.07792		2.67907	-8.52918
4.29224	-1.14472		2.68324	-8.4511
4.2989	-1.12009		2.6874	-8.37999
4.30557	-1.03128		2.69157	-8.33404
4.31223	-0.91081		2.69573	-8.28983
4.31889	-0.80655		2.6999	-8.22755
4.32556	-0.79812		2.70406	-8.16681
4.33223	-0.81078		2.70823	-8.17623
4.33889	-0.92211		2.7124	-8.27835
4.34556	-1.0083		2.71656	-8.45967
4.35223	-1.0273		2.72073	-8.65899
4.35889	-1.01989		2.72489	-8.80565
4.36556	-0.97689		2.72906	-8.83393
4.37222	-0.96969		2.73322	-8.73806
4.37888	-1.00222		2.73739	-8.60758
4.38555	-1.06494		2.74155	-8.49568
4.39221	-1.12783		2.74572	-8.40737
4.39888	-1.13979		2.74989	-8.33427
4.40555	-1.0968		2.75406	-8.29395
4.41221	-1.06698		2.75822	-8.27726
4.41888	-1.09841		2.76239	-8.29262
4.42555	-1.13876		2.76656	-8.33957
4.43221	-1.1157		2.77072	-8.4273
4.43887	-1.04934		2.77489	-8.5548
4.44554	-1.01264		2.77905	-8.71662
4.4522	-0.98558		2.78322	-8.84553
4.45887	-0.97727		2.78738	-8.87838
4.46554	-0.91276		2.79155	-8.80122
4.4722	-0.88459		2.79572	-8.68785
4.47887	-0.94074		2.79988	-8.57153
4.48553	-0.98958		2.80405	-8.44567
4.4922	-1.03869		2.80821	-8.36477
4.49886	-0.98244		2.81238	-8.35231
4.50552	-0.96588		2.81654	-8.36403
4.51219	-0.95665		2.82071	-8.36775
4.51886	-1.00878		2.82487	-8.41897
4.52552	-1.04375		2.82904	-8.59007
4.53219	-1.07442		2.83321	-8.76498
4.53886	-1.10801		2.83737	-8.9067
4.54552	-1.19507		2.84154	-9.01613
4.55219	-1.24407		2.8457	-9.06431
4.55885	-1.24836		2.84987	-8.96534
4.56551	-1.15158		2.85403	-8.87405
4.57218	-1.07883		2.8582	-8.79672
4.57884	-0.99315		2.86237	-8.68968
4.58551	-0.91593		2.86653	-8.59935
4.59218	-0.87401		2.8707	-8.6182
4.59884	-0.87989		2.87486	-8.67891
4.60551	-0.93157		2.87903	-8.76156
4.61218	-0.99036		2.88319	-8.91178
4.61883	-0.99795		2.88737	-9.06246
4.6255	-1.02279		2.89153	-9.13451
4.63217	-1.07087		2.8957	-9.08402
4.63883	-1.10001		2.89986	-8.95007
4.6455	-1.08629		2.90403	-8.80953
4.65217	-1.03147		2.90819	-8.69576
4.65883	-1.0435		2.91236	-8.58248
4.6655	-1.07517		2.91653	-8.54493
4.67216	-1.04578		2.92069	-8.5477
4.67883	-1.03636		2.92486	-8.54663
4.68549	-1.06601		2.92902	-8.60624
4.69215	-1.08771		2.93319	-8.72485
4.69882	-1.01716		2.93735	-8.83487
4.70549	-0.92558		2.94152	-8.92207
4.71215	-0.85999		2.94569	-8.96641
4.71882	-0.87737		2.94985	-8.90734
4.72549	-0.84592		2.95402	-8.78025
4.73215	-0.8457		2.95818	-8.62889
4.73882	-0.84073		2.96235	-8.50167
4.74548	-0.8848		2.96652	-8.45372
4.75214	-0.95799		2.97068	-8.47606
4.75881	-1.09385		2.97485	-8.56305
4.76547	-1.14799		2.97901	-8.71597
4.77214	-1.17927		2.98318	-8.87133
4.77881	-1.19727		2.98734	-8.92348
4.78547	-1.19966		2.99151	-8.89939
4.79214	-1.18746		2.99567	-8.82512
4.79881	-1.10681		2.99984	-8.67796
4.80547	-1.04913		3.00401	-8.54766
4.81213	-0.98065		3.00817	-8.49684
4.8188	-0.91797		3.01234	-8.44844
4.82546	-0.87643		3.0165	-8.406
4.83213	-0.86234		3.02067	-8.36529
4.8388	-0.8505		3.02484	-8.35596
4.84546	-0.85109		3.02901	-8.41828
4.85213	-0.8522		3.03317	-8.54621
4.85879	-0.84525		3.03734	-8.66903
4.86546	-0.85302		3.0415	-8.82262
4.87212	-0.90174		3.04567	-8.8836
4.87878	-0.93808		3.04984	-8.76738
4.88545	-1.01612		3.054	-8.58243
4.89212	-1.08662		3.05817	-8.41817
4.89878	-1.17876		3.06233	-8.26737
4.90545	-1.22039		3.0665	-8.21983
4.91212	-1.20917		3.07066	-8.26663
4.91878	-1.1616		3.07483	-8.33246
4.92545	-1.12851		3.07899	-8.41065
4.93211	-1.05011		3.08316	-8.48873
4.93877	-1.00947		3.08733	-8.50852
4.94544	-0.95641		3.09149	-8.44892
4.9521	-0.99588		3.09566	-8.3286
4.95877	-0.97692		3.09982	-8.20518
4.96544	-0.91526		3.10399	-8.10979
4.9721	-0.86663		3.10815	-8.02124
4.97877	-0.89143		3.11232	-7.95876
4.98544	-0.99455		3.11649	-7.95528
4.9921	-1.03597		3.12065	-7.92821
4.99876	-1.06133		3.12482	-7.8858
5.00543	-1.08832		3.12898	-7.91246
5.01209	-1.13683		3.13315	-8.01359
5.01876	-1.15042		3.13731	-8.08976
5.02543	-1.16933		3.14148	-8.14461
5.03209	-1.1881		3.14565	-8.16698
5.03876	-1.15864		3.14981	-8.10728
5.04542	-1.10769		3.15398	-8.00589
5.05209	-1.00152		3.15814	-7.9574
5.05875	-0.96729		3.16232	-7.94758
5.06541	-0.89914		3.16648	-7.92102
5.07208	-0.89647		3.17065	-7.90082
5.07875	-0.87079		3.17481	-7.88946
5.08541	-0.95741		3.17898	-7.86137
5.09208	-1.00813		3.18314	-7.79046
5.09875	-1.03923		3.18731	-7.72185
5.10541	-1.03369		3.19147	-7.65964
5.11208	-1.0451		3.19564	-7.5901
5.11874	-1.10359		3.19981	-7.54346
5.1254	-1.14221		3.20397	-7.57903
5.13207	-1.16334		3.20814	-7.66269
5.13874	-1.1375		3.2123	-7.76448
5.1454	-1.08041		3.21647	-7.90212
5.15207	-1.03076		3.22063	-8.04794
5.15873	-1.05259		3.2248	-8.14528
5.1654	-1.04876		3.22897	-8.15044
5.17207	-1.00385		3.23313	-8.1049
5.17873	-0.95765		3.2373	-8.04229
5.18539	-0.90282		3.24146	-7.95282
5.19206	-0.90809		3.24563	-7.83188
5.19872	-0.86578		3.24979	-7.74076
5.20539	-0.85531		3.25396	-7.70018
5.21206	-0.84953		3.25813	-7.70008
5.21872	-0.86573		3.26229	-7.81076
5.22539	-0.91349		3.26646	-7.99953
5.23206	-0.94572		3.27062	-8.20782
5.23872	-0.99494		3.27479	-8.3289
5.24538	-1.0188		3.27895	-8.36042
5.25205	-1.03909		3.28312	-8.28427
5.25871	-1.03379		3.28728	-8.15356
5.26538	-1.06273		3.29145	-8.02058
5.27204	-1.07672		3.29562	-7.95417
5.27871	-1.04718		3.29979	-7.95383
5.28538	-0.98993		3.30396	-7.97371
5.29204	-0.95709		3.30812	-7.99942
5.29871	-0.95047		3.31229	-8.00941
5.30537	-0.93351		3.31645	-8.0098
5.31204	-0.90315		3.32062	-7.98901
5.3187	-0.88334		3.32478	-7.93875
5.32537	-0.91629		3.32895	-7.86106
5.33203	-0.8677		3.33312	-7.82963
5.3387	-0.81411		3.33728	-7.86222
5.34536	-0.78515		3.34145	-7.88385
5.35203	-0.86181		3.34561	-7.86547
5.3587	-0.92421		3.34978	-7.84935
5.36536	-0.97062		3.35394	-7.84665
5.37203	-0.99339		3.35811	-7.80736
5.37869	-0.98867		3.36227	-7.78505
5.38535	-1.01655		3.36644	-7.8068
5.39202	-0.98983		3.3706	-7.87183
5.39869	-1.03552		3.37477	-7.92137
5.40535	-1.05712		3.37894	-7.91192
5.41202	-1.07091		3.3831	-7.80733
5.41869	-1.02225		3.38727	-7.70834
5.42535	-0.99541		3.39143	-7.65745
5.43201	-0.90954		3.3956	-7.60862
5.43868	-0.87378		3.39977	-7.55315
5.44534	-0.84741		3.40393	-7.51027
5.45201	-0.85579		3.4081	-7.45887
5.45867	-0.80704		3.41226	-7.35516
5.46534	-0.75511		3.41643	-7.2552
5.47201	-0.76737		3.42059	-7.2991
5.47867	-0.83357		3.42476	-7.4753
5.48534	-0.92323		3.42893	-7.67723
5.492	-0.93		3.4331	-7.90438
5.49867	-0.97406		3.43726	-8.02269
5.50533	-0.99458		3.44143	-7.97965
5.512	-1.04394		3.44559	-7.87159
5.51866	-1.07766		3.44976	-7.73593
5.52533	-1.04706		3.45393	-7.55521
5.53199	-0.9954		3.45809	-7.43768
5.53866	-0.9548		3.46226	-7.39217
5.54533	-0.88415		3.46642	-7.35418
5.55199	-0.81007		3.47059	-7.3237
5.55866	-0.66923		3.47475	-7.32627
5.56532	-0.65294		3.47892	-7.38666
5.57198	-0.68996		3.48309	-7.45433
5.57865	-0.70892		3.48725	-7.49198
5.58532	-0.71194		3.49142	-7.53367
5.59198	-0.71855		3.49558	-7.58023
5.59865	-0.79344		3.49975	-7.60517
5.60532	-0.87119		3.50391	-7.65073
5.61198	-0.88714		3.50808	-7.71264
5.61865	-0.88925		3.51225	-7.76156
5.6253	-0.93246		3.51641	-7.7448
5.63197	-0.94145		3.52058	-7.65693
5.63864	-0.94054		3.52474	-7.51738
5.6453	-0.90497		3.52891	-7.38144
5.65197	-0.89372		3.53307	-7.27179
5.65864	-0.91779		3.53724	-7.21263
5.6653	-0.88185		3.5414	-7.20624
5.67197	-0.84375		3.54557	-7.18718
5.67864	-0.81321		3.54974	-7.14875
5.6853	-0.75097		3.5539	-7.14893
5.69196	-0.7233		3.55807	-7.2387
5.69863	-0.67695		3.56223	-7.39309
5.70529	-0.76749		3.5664	-7.55181
5.71196	-0.87999		3.57057	-7.68797
5.71862	-0.97451		3.57474	-7.78991
5.72529	-0.99245		3.5789	-7.78587
5.73196	-1.03077		3.58307	-7.6907
5.73862	-1.06153		3.58723	-7.59928
5.74529	-1.11512		3.5914	-7.54448
5.75195	-1.07265		3.59557	-7.48085
5.75861	-1.01158		3.59973	-7.42822
5.76528	-0.94832		3.6039	-7.37273
5.77195	-0.91242		3.60806	-7.31204
5.77861	-0.89954		3.61223	-7.25027
5.78528	-0.85563		3.61639	-7.18501
5.79195	-0.87101		3.62056	-7.09007
5.79861	-0.89938		3.62472	-7.0059
5.80528	-0.91475		3.62889	-6.99288
5.81193	-0.85802		3.63306	-7.00539
5.8186	-0.79143		3.63722	-7.02197
5.82527	-0.79405		3.64139	-7.11943
5.83193	-0.88216		3.64555	-7.25606
5.8386	-0.93648		3.64972	-7.34087
5.84527	-0.93425		3.65389	-7.38129
5.85193	-0.94381		3.65805	-7.39033
5.8586	-0.97983		3.66222	-7.28985
5.86527	-1.01933		3.66638	-7.13589
5.87192	-0.97149		3.67055	-7.02413
5.87859	-0.93655		3.67471	-6.96164
5.88526	-0.93791		3.67888	-6.9132
5.89192	-0.99141		3.68304	-6.88633
5.89859	-0.97336		3.68721	-6.86053
5.90525	-0.9198		3.69138	-6.82736
5.91192	-0.89634		3.69554	-6.85013
5.91859	-0.80252		3.69971	-6.95833
5.92525	-0.76845		3.70387	-7.13501
5.93191	-0.74288		3.70805	-7.31524
5.93858	-0.81943		3.71221	-7.45258
5.94524	-0.88674		3.71638	-7.51833
5.95191	-0.93106		3.72054	-7.48501
5.95858	-1.00719		3.72471	-7.37854
5.96524	-1.10926		3.72887	-7.25477
5.97191	-1.19782		3.73304	-7.14139
5.97858	-1.17068		3.73721	-7.03233
5.98524	-1.11851		3.74137	-6.94805
5.99191	-1.08269		3.74554	-6.89564
5.99857	-1.10756		3.7497	-6.88244
6.00523	-1.07066		3.75387	-6.83568
6.0119	-1.02747		3.75803	-6.76622
6.01856	-0.95408		3.7622	-6.71654
6.02523	-0.94748		3.76637	-6.70342
6.0319	-0.91844		3.77053	-6.73632
6.03856	-0.90976		3.7747	-6.84717
6.04523	-0.94515		3.77886	-6.99719
6.0519	-0.98512		3.78303	-7.11637
6.05856	-1.05681		3.78719	-7.22421
6.06522	-1.02634		3.79136	-7.28112
6.07189	-1.06491		3.79552	-7.26496
6.07855	-1.11236		3.79969	-7.24476
6.08522	-1.2262		3.80386	-7.1997
6.09189	-1.28408		3.80802	-7.09667
6.09855	-1.23065		3.81219	-6.99478
6.10522	-1.13005		3.81635	-6.91819
6.11188	-1.0345		3.82052	-6.82604
6.11855	-1.00749		3.82468	-6.81124
6.12521	-0.96038		3.82885	-6.94666
6.13187	-0.89816		3.83302	-7.13344
6.13854	-0.86949		3.83718	-7.29861
6.14521	-0.90413		3.84135	-7.40251
6.15187	-0.99631		3.84552	-7.41295
6.15854	-1.08131		3.84969	-7.32625
6.16521	-1.14059		3.85385	-7.2075
6.17187	-1.22149		3.85802	-7.11104
6.17853	-1.26034		3.86218	-7.06481
6.1852	-1.28617		3.86635	-7.05045
6.19186	-1.24403		3.87051	-7.0554
6.19853	-1.21317		3.87468	-7.10486
6.20519	-1.25083		3.87884	-7.18347
6.21186	-1.21638		3.88301	-7.28538
6.21853	-1.12769		3.88718	-7.38842
6.22519	-0.99603		3.89134	-7.43414
6.23186	-0.93445		3.89551	-7.38934
6.23853	-0.94077		3.89967	-7.3181
6.24519	-0.94405		3.90384	-7.29199
6.25185	-0.96781		3.90801	-7.32897
6.25852	-0.98673		3.91217	-7.36041
6.26518	-1.00511		3.91634	-7.33231
6.27185	-1.07898		3.9205	-7.2888
6.27852	-1.13186		3.92467	-7.2079
6.28518	-1.17759		3.92883	-7.07602
6.29185	-1.24205		3.933	-7.00558
6.29851	-1.2489		3.93716	-7.12086
6.30518	-1.2664		3.94133	-7.35419
6.31184	-1.23881		3.9455	-7.57644
6.3185	-1.18975		3.94966	-7.76906
6.32517	-1.10295		3.95383	-7.9142
6.33184	-1.01525		3.95799	-7.94621
6.3385	-0.95964		3.96216	-7.87258
6.34517	-0.97823		3.96632	-7.78277
6.35184	-0.96446		3.97049	-7.71905
6.3585	-0.95881		3.97465	-7.67987
6.36517	-0.93582		3.97882	-7.66825
6.37183	-0.97637		3.98299	-7.66909
6.37849	-0.95388		3.98716	-7.67814
6.38516	-0.94921		3.99133	-7.69722
6.39182	-0.94374		3.99549	-7.71696
6.39849	-0.97106		3.99966	-7.71299
6.40516	-1.07813		4.00382	-7.68303
6.41182	-1.16427		4.00799	-7.66765
6.41849	-1.22631		4.01215	-7.65395
6.42516	-1.20577		4.01632	-7.65028
6.43182	-1.13683		4.02049	-7.72758
6.43848	-1.044		4.02465	-7.87679
6.44515	-0.94711		4.02882	-8.02449
6.45181	-0.83684		4.03298	-8.11933
6.45848	-0.75373		4.03715	-8.15284
6.46515	-0.73832		4.04131	-8.1478
6.47181	-0.73993		4.04548	-8.11612
6.47848	-0.8264		4.04964	-8.00041
6.48514	-0.88702		4.05381	-7.84659
6.49181	-0.93394		4.05798	-7.73716
6.49847	-0.98714		4.06214	-7.69414
6.50514	-1.05468		4.06631	-7.75493
6.5118	-1.10864		4.07047	-7.93539
6.51847	-1.14944		4.07464	-8.17417
6.52513	-1.16724		4.0788	-8.38234
6.5318	-1.09261		4.08297	-8.44876
6.53847	-0.94485		4.08714	-8.33831
6.54513	-0.82586		4.0913	-8.16518
6.5518	-0.80547		4.09547	-8.01778
6.55846	-0.81582		4.09963	-7.93767
6.56513	-0.80099		4.1038	-7.92101
6.57179	-0.80096		4.10796	-7.95591
6.57845	-0.82741		4.11213	-8.01821
6.58512	-0.88982		4.1163	-8.05352
6.59179	-0.95551		4.12047	-8.03316
6.59845	-0.9977		4.12463	-7.99313
6.60512	-1.03394		4.1288	-7.953
6.61179	-1.04578		4.13296	-7.89916
6.61845	-1.07085		4.13713	-7.86137
6.62511	-1.03881		4.1413	-7.83147
6.63178	-1.01061		4.14546	-7.81263
6.63844	-1.01344		4.14963	-7.84964
6.64511	-0.98503		4.15379	-7.97283
6.65178	-0.95605		4.15796	-8.14292
6.65844	-0.91633		4.16213	-8.31833
6.66511	-0.84927		4.16629	-8.45223
6.67177	-0.81447		4.17046	-8.45726
6.67844	-0.69712		4.17462	-8.34204
6.6851	-0.70158		4.17879	-8.19991
6.69176	-0.68488		4.18295	-8.08706
6.69843	-0.71063		4.18712	-7.99525
6.7051	-0.75775		4.19128	-7.97961
6.71176	-0.81678		4.19545	-7.99922
6.71843	-0.83106		4.19962	-8.03179
6.7251	-0.84091		4.20378	-8.11491
6.73176	-0.79085		4.20795	-8.24865
6.73843	-0.78007		4.21211	-8.39045
6.74509	-0.76711		4.21628	-8.50901
6.75176	-0.72692		4.22044	-8.56591
6.75842	-0.73157		4.22461	-8.54613
6.76508	-0.75252		4.22877	-8.4817
6.77175	-0.84519		4.23294	-8.40235
6.77842	-0.89804		4.23711	-8.39004
6.78508	-0.89704		4.24127	-8.42813
6.79175	-0.91658		4.24544	-8.43552
6.79842	-0.97317		4.2496	-8.42339
6.80508	-0.98352		4.25378	-8.4045
6.81175	-0.94364		4.25794	-8.36781
6.81841	-0.86122		4.26211	-8.3635
6.82507	-0.8736		4.26627	-8.417
6.83174	-0.86113		4.27044	-8.50978
6.83841	-0.77025		4.27461	-8.58488
6.84507	-0.70189		4.27877	-8.61842
6.85174	-0.6373		4.28294	-8.63128
6.85841	-0.65117		4.2871	-8.60807
6.86507	-0.66205		4.29127	-8.51299
6.87174	-0.6862		4.29543	-8.41381
6.87839	-0.72382		4.2996	-8.38507
6.88506	-0.74053		4.30376	-8.42835
6.89173	-0.78052		4.30793	-8.53481
6.89839	-0.86488		4.3121	-8.71496
6.90506	-0.94335		4.31626	-8.93075
6.91173	-0.96563		4.32043	-9.04594
6.91839	-0.97241		4.32459	-9.01279
6.92506	-0.89822		4.32876	-8.90755
6.93173	-0.83948		4.33292	-8.7841
6.93838	-0.72936		4.33709	-8.67744
6.94505	-0.66383		4.34125	-8.61277
6.95172	-0.60713		4.34542	-8.55749
6.95838	-0.56309		4.34959	-8.48946
6.96505	-0.58006		4.35375	-8.43881
6.97171	-0.66533		4.35792	-8.39614
6.97838	-0.78355		4.36208	-8.35244
6.98505	-0.82545		4.36625	-8.33054
6.99171	-0.81927		4.37042	-8.34681
6.99838	-0.7661		4.37458	-8.35664
7.00504	-0.77784		4.37875	-8.34673
7.0117	-0.83124		4.38291	-8.35418
7.01837	-0.90304		4.38708	-8.39522
7.02504	-0.90909		4.39125	-8.47082
7.0317	-0.925		4.39542	-8.57156
7.03837	-0.86285		4.39958	-8.68956
7.04504	-0.83827		4.40375	-8.786
7.0517	-0.75348		4.40791	-8.80742
7.05837	-0.74305		4.41208	-8.79444
7.06503	-0.62578		4.41625	-8.79379
7.07169	-0.5883		4.42041	-8.73221
7.07836	-0.53833		4.42458	-8.60882
7.08502	-0.58052		4.42874	-8.52767
7.09169	-0.60331		4.43291	-8.48331
7.09836	-0.59403		4.43707	-8.47507
7.10502	-0.62879		4.44124	-8.58691
7.11169	-0.66311		4.4454	-8.76503
7.11836	-0.74344		4.44957	-8.91816
7.12501	-0.81139		4.45374	-9.03272
7.13168	-0.8557		4.4579	-9.06438
7.13835	-0.87738		4.46207	-9.01065
7.14501	-0.86349		4.46623	-8.95493
7.15168	-0.87031		4.4704	-8.9244
7.15834	-0.90738		4.47456	-8.88295
7.16501	-0.95531		4.47873	-8.82055
7.17168	-0.95031		4.4829	-8.78901
7.17834	-0.93937		4.48706	-8.81467
7.185	-0.93583		4.49123	-8.83302
7.19167	-0.94439		4.49539	-8.81104
7.19833	-0.86384		4.49956	-8.81709
7.205	-0.79461		4.50372	-8.82894
7.21167	-0.70608		4.50789	-8.78977
7.21833	-0.68801		4.51205	-8.75262
7.225	-0.67399		4.51622	-8.7631
7.23167	-0.67581		4.52039	-8.7775
7.23833	-0.68731		4.52455	-8.79722
7.245	-0.70404		4.52873	-8.8371
7.25166	-0.68507		4.53289	-8.91408
7.25832	-0.71961		4.53706	-9.02656
7.26499	-0.71358		4.54122	-9.1335
7.27165	-0.72463		4.54539	-9.17252
7.27832	-0.75385		4.54955	-9.12144
7.28499	-0.83223		4.55372	-8.99013
7.29165	-0.88122		4.55788	-8.83204
7.29832	-0.91184		4.56205	-8.72665
7.30499	-0.87758		4.56622	-8.67791
7.31165	-0.87959		4.57038	-8.68967
7.31831	-0.88054		4.57455	-8.75705
7.32498	-0.89463		4.57871	-8.85948
7.33164	-0.92024		4.58288	-8.98796
7.33831	-0.93202		4.58704	-9.137
7.34497	-0.93852		4.59121	-9.29815
7.35164	-0.92545		4.59537	-9.39037
7.35831	-0.91257		4.59954	-9.35391
7.36497	-0.89611		4.60371	-9.1939
7.37163	-0.84624		4.60787	-8.98376
7.3783	-0.76946		4.61204	-8.7751
7.38496	-0.70623		4.6162	-8.62311
7.39163	-0.62031		4.62037	-8.57898
7.3983	-0.57971		4.62454	-8.6068
7.40496	-0.52141		4.6287	-8.63598
7.41163	-0.57524		4.63287	-8.64452
7.4183	-0.65432		4.63703	-8.66253
7.42496	-0.74006		4.6412	-8.66877
7.43162	-0.77447		4.64536	-8.67693
7.43829	-0.82938		4.64953	-8.69913
7.44495	-0.80178		4.65369	-8.74556
7.45162	-0.83009		4.65786	-8.8195
7.45828	-0.87033		4.66203	-8.91209
7.46495	-0.89099		4.6662	-8.99196
7.47162	-0.89396		4.67036	-9.02938
7.47828	-0.84169		4.67453	-9.0188
7.48495	-0.85537		4.6787	-8.96369
7.49162	-0.8645		4.68286	-8.87166
7.49828	-0.83411		4.68703	-8.73258
7.50494	-0.77889		4.69119	-8.60279
7.51161	-0.7116		4.69536	-8.51401
7.51827	-0.6628		4.69952	-8.45943
7.52494	-0.68435		4.70369	-8.48915
7.5316	-0.7196		4.70786	-8.61038
7.53827	-0.75947		4.71202	-8.77493
7.54494	-0.77793		4.71619	-8.95984
7.5516	-0.78142		4.72035	-9.08396
7.55827	-0.80684		4.72452	-9.08918
7.56493	-0.82649		4.72868	-9.01589
7.57159	-0.85319		4.73285	-8.8915
7.57826	-0.85507		4.73702	-8.73791
7.58493	-0.93273		4.74118	-8.6022
7.59159	-0.95814		4.74535	-8.49254
7.59826	-0.95389		4.74951	-8.40533
7.60493	-0.89585		4.75368	-8.3501
7.61159	-0.88514		4.75784	-8.31381
7.61826	-0.91661		4.76201	-8.32976
7.62492	-0.8509		4.76617	-8.40472
7.63158	-0.81079		4.77034	-8.51436
7.63825	-0.75162		4.77451	-8.66862
7.64491	-0.69197		4.77867	-8.8347
7.65158	-0.66805		4.78284	-8.93866
7.65825	-0.68459		4.787	-8.92763
7.66491	-0.80801		4.79117	-8.82666
7.67158	-0.82684		4.79533	-8.6955
7.67825	-0.86432		4.7995	-8.52922
7.68491	-0.93998		4.80367	-8.3823
7.69157	-1.03587		4.80784	-8.30086
7.69824	-1.06092		4.812	-8.26861
7.7049	-0.97766		4.81617	-8.28593
7.71157	-0.93346		4.82034	-8.37692
7.71824	-0.89368		4.8245	-8.4968
7.7249	-0.86964		4.82867	-8.63187
7.73157	-0.82451		4.83283	-8.74155
7.73823	-0.80006		4.837	-8.75554
7.7449	-0.79292		4.84116	-8.70313
7.75156	-0.84618		4.84533	-8.62482
7.75822	-0.87303		4.84949	-8.5472
7.76489	-0.90499		4.85366	-8.46281
7.77156	-0.88689		4.85783	-8.36949
7.77822	-0.86941		4.86199	-8.25503
7.78489	-0.92553		4.86616	-8.14898
7.79156	-1.0213		4.87032	-8.03643
7.79822	-1.08222		4.87449	-7.94865
7.80489	-1.01096		4.87865	-7.9412
7.81155	-0.97871		4.88282	-7.9842
7.81821	-0.99765		4.88699	-8.00655
7.82488	-0.98004		4.89115	-8.0378
7.83154	-0.91765		4.89532	-8.11576
7.83821	-0.87168		4.89948	-8.20321
7.84488	-0.86555		4.90365	-8.30775
7.85154	-0.88472		4.90781	-8.44684
7.85821	-0.88925		4.91198	-8.54224
7.86488	-0.89387		4.91615	-8.51676
7.87154	-0.94475		4.92031	-8.4312
7.8782	-1.00521		4.92448	-8.3015
7.88487	-1.06505		4.92864	-8.11354
7.89153	-1.11519		4.93281	-7.96846
7.8982	-1.15864		4.93698	-7.90821
7.90487	-1.18612		4.94115	-7.86471
7.91153	-1.15104		4.94531	-7.86437
7.9182	-1.10985		4.94948	-7.96204
7.92486	-1.06796		4.95364	-8.13499
7.93153	-1.02152		4.95781	-8.33908
7.93819	-0.96174		4.96198	-8.52233
7.94485	-0.89279		4.96614	-8.60131
7.95152	-0.8471		4.97031	-8.55261
7.95819	-0.81649		4.97447	-8.38325
7.96485	-0.81757		4.97864	-8.1562
7.97152	-0.87279		4.9828	-7.95292
7.97819	-0.92078		4.98697	-7.82671
7.98485	-0.93752		4.99114	-7.80417
7.99152	-0.94374		4.9953	-7.8585
7.99818	-0.93949		4.99947	-7.94748
8.00485	-0.96725		5.00363	-8.06445
8.01151	-1.01435		5.0078	-8.2043
8.01817	-1.06543		5.01196	-8.33442
8.02484	-1.10506		5.01613	-8.39255
8.03151	-1.1192		5.02029	-8.36532
8.03817	-1.10256		5.02446	-8.27502
8.04484	-1.0439		5.02862	-8.12368
8.05151	-0.95441		5.03279	-7.92792
8.05817	-0.84215		5.03696	-7.79331
8.06484	-0.7626		5.04112	-7.74437
8.0715	-0.76004		5.04529	-7.709
8.07816	-0.80626		5.04945	-7.71493
8.08483	-0.86936		5.05362	-7.80293
8.0915	-0.90009		5.05779	-7.92913
8.09816	-0.93081		5.06195	-8.05313
8.10483	-1.00793		5.06612	-8.1754
8.11149	-1.06165		5.07028	-8.25663
8.11816	-1.0974		5.07446	-8.24947
8.12483	-1.10575		5.07862	-8.17818
8.13148	-1.06804		5.08279	-8.08151
8.13815	-0.99099		5.08695	-7.98038
8.14482	-0.91274		5.09112	-7.90701
8.15148	-0.89305		5.09528	-7.88462
8.15815	-0.89275		5.09945	-7.87184
8.16482	-0.86729		5.10361	-7.85189
8.17148	-0.84956		5.10778	-7.82003
8.17815	-0.87307		5.11195	-7.75585
8.18481	-0.90917		5.11611	-7.65876
8.19147	-0.95651		5.12028	-7.5481
8.19814	-1.01196		5.12444	-7.50531
8.2048	-1.05236		5.12861	-7.57532
8.21147	-1.05625		5.13277	-7.69595
8.21814	-1.03338		5.13694	-7.82881
8.2248	-1.03725		5.14111	-7.96908
8.23147	-1.05674		5.14527	-8.03225
8.23814	-1.04924		5.14944	-8.01022
8.2448	-0.98811		5.1536	-7.98233
8.25147	-0.89932		5.15777	-7.9018
8.25813	-0.82066		5.16193	-7.75394
8.26479	-0.79252		5.1661	-7.6374
8.27146	-0.8056		5.17027	-7.55345
8.27813	-0.84669		5.17443	-7.4835
8.28479	-0.87327		5.1786	-7.53416
8.29146	-0.85705		5.18276	-7.70349
8.29812	-0.85844		5.18693	-7.84204
8.30479	-0.86974		5.19109	-7.94509
8.31146	-0.87215		5.19526	-8.01381
8.31812	-0.85514		5.19942	-7.98496
8.32478	-0.82394		5.20359	-7.89702
8.33145	-0.82491		5.20776	-7.81759
8.33811	-0.84105		5.21193	-7.75179
8.34478	-0.87632		5.2161	-7.67489
8.35145	-0.91494		5.22026	-7.59377
8.35811	-0.93301		5.22443	-7.53436
8.36478	-0.97152		5.22859	-7.49965
8.37145	-1.04969		5.23276	-7.46234
8.3781	-1.10613		5.23692	-7.42668
8.38477	-1.07653		5.24109	-7.38562
8.39143	-0.98322		5.24526	-7.32741
8.3981	-0.9286		5.24942	-7.30951
8.40477	-0.92178		5.25359	-7.32836
8.41143	-0.87754		5.25775	-7.36609
8.4181	-0.80847		5.26192	-7.46589
8.42477	-0.74355		5.26608	-7.61306
8.43143	-0.69187		5.27025	-7.74271
8.43809	-0.66193		5.27441	-7.85359
8.44476	-0.65901		5.27858	-7.92096
8.45142	-0.69719		5.28274	-7.86309
8.45809	-0.73174		5.28691	-7.72391
8.46476	-0.7658		5.29108	-7.5915
8.47142	-0.83434		5.29524	-7.48157
8.47809	-0.90413		5.29941	-7.39736
8.48476	-0.94016		5.30357	-7.34039
8.49142	-0.9039		5.30774	-7.27233
8.49809	-0.86379		5.31191	-7.17019
8.50475	-0.83991		5.31607	-7.10721
8.51141	-0.79001		5.32024	-7.17082
8.51808	-0.71702		5.3244	-7.33842
8.52474	-0.66292		5.32857	-7.55076
8.53141	-0.66613		5.33273	-7.79008
8.53808	-0.68263		5.3369	-7.96827
8.54474	-0.67036		5.34106	-7.95317
8.55141	-0.66797		5.34523	-7.82558
8.55808	-0.68438		5.3494	-7.70718
8.56474	-0.71068		5.35357	-7.55997
8.5714	-0.71609		5.35773	-7.38904
8.57807	-0.7327		5.3619	-7.28739
8.58473	-0.78345		5.36607	-7.23645
8.5914	-0.84929		5.37023	-7.18416
8.59806	-0.88899		5.3744	-7.14594
8.60473	-0.88586		5.37856	-7.11396
8.6114	-0.87837		5.38273	-7.07807
8.61806	-0.85532		5.38689	-7.0677
8.62472	-0.80031		5.39106	-7.09049
8.63139	-0.73735		5.39523	-7.14666
8.63805	-0.69256		5.39939	-7.26695
8.64472	-0.66914		5.40356	-7.43262
8.65139	-0.65354		5.40772	-7.57925
8.65805	-0.64953		5.41189	-7.66108
8.66472	-0.68127		5.41605	-7.65255
8.67139	-0.71438		5.42022	-7.56387
8.67805	-0.76483		5.42439	-7.44254
8.68471	-0.84788		5.42855	-7.30833
8.69138	-0.91904		5.43272	-7.18699
8.69804	-0.92817		5.43688	-7.14053
8.70471	-0.88055		5.44105	-7.17992
8.71137	-0.81774		5.44521	-7.25414
8.71804	-0.76497		5.44938	-7.36791
8.72471	-0.71094		5.45354	-7.52703
8.73137	-0.64127		5.45771	-7.67255
8.73804	-0.57793		5.46188	-7.73052
8.74471	-0.57819		5.46604	-7.67201
8.75137	-0.65746		5.47021	-7.528
8.75803	-0.76056		5.47437	-7.35785
8.7647	-0.806		5.47854	-7.18855
8.77136	-0.81626		5.4827	-7.02432
8.77803	-0.86668		5.48688	-6.93279
8.78469	-0.93056		5.49104	-6.93636
8.79136	-0.94525		5.49521	-6.96814
8.79803	-0.91163		5.49937	-7.0059
8.80469	-0.88472		5.50354	-7.09821
8.81136	-0.88195		5.50771	-7.25584
8.81802	-0.86337		5.51187	-7.40127
8.82468	-0.79882		5.51604	-7.52884
8.83135	-0.71856		5.5202	-7.63257
8.83802	-0.67904		5.52437	-7.63654
8.84468	-0.68827		5.52853	-7.54918
8.85135	-0.73102		5.5327	-7.47086
8.85802	-0.7724		5.53686	-7.37642
8.86468	-0.80429		5.54103	-7.25641
8.87135	-0.86643		5.5452	-7.19831
8.87801	-0.93584		5.54936	-7.16904
8.88467	-0.9841		5.55353	-7.09922
8.89134	-0.9648		5.55769	-7.03391
8.898	-0.8878		5.56186	-7.04204
8.90467	-0.78067		5.56603	-7.1464
8.91134	-0.67742		5.57019	-7.36077
8.918	-0.61951		5.57436	-7.61655
8.92467	-0.58864		5.57852	-7.88065
8.93133	-0.6035		5.58269	-8.02795
8.938	-0.64582		5.58685	-7.99864
8.94466	-0.70217		5.59102	-7.86444
8.95133	-0.75134		5.59518	-7.70276
8.95799	-0.7917		5.59935	-7.5169
8.96466	-0.86112		5.60352	-7.35391
8.97132	-0.91222		5.60768	-7.28821
8.97799	-0.94576		5.61185	-7.27783
8.98466	-0.94199		5.61601	-7.29447
8.99132	-0.88107		5.62018	-7.37663
8.99799	-0.79534		5.62435	-7.53917
9.00465	-0.72196		5.62852	-7.7074
9.01131	-0.70048		5.63268	-7.84025
9.01798	-0.68342		5.63685	-7.92617
9.02465	-0.63093		5.64101	-7.91418
9.03131	-0.58788		5.64518	-7.82778
9.03798	-0.60598		5.64934	-7.74667
9.04465	-0.66786		5.65351	-7.66484
9.05131	-0.72177		5.65768	-7.56962
9.05798	-0.72908		5.66184	-7.51741
9.06464	-0.69941		5.66601	-7.52814
9.0713	-0.69042		5.67017	-7.58082
9.07797	-0.75094		5.67434	-7.67586
9.08463	-0.81432		5.67851	-7.81002
9.0913	-0.85195		5.68267	-7.97498
9.09797	-0.85521		5.68684	-8.1361
9.10463	-0.84159		5.691	-8.25781
9.1113	-0.79511		5.69517	-8.27202
9.11797	-0.70658		5.69933	-8.20056
9.12463	-0.6371		5.7035	-8.12199
9.13129	-0.58778		5.70766	-8.0248
9.13796	-0.56057		5.71183	-7.87581
9.14462	-0.56107		5.716	-7.75348
9.15129	-0.5927		5.72016	-7.70887
9.15795	-0.63322		5.72433	-7.67478
9.16462	-0.65233		5.72849	-7.699
9.17129	-0.64296		5.73266	-7.82207
9.17795	-0.6263		5.73682	-7.98464
9.18462	-0.6268		5.74099	-8.1422
9.19128	-0.67273		5.74515	-8.28488
9.19794	-0.7083		5.74932	-8.35081
9.20461	-0.71386		5.75349	-8.32614
9.21128	-0.72592		5.75766	-8.27822
9.21794	-0.73229		5.76183	-8.21992
9.22461	-0.72365		5.76599	-8.11368
9.23128	-0.69876		5.77016	-7.99049
9.23794	-0.71874		5.77432	-7.90494
9.24461	-0.79913		5.77849	-7.82181
9.25127	-0.85867		5.78265	-7.73742
9.25794	-0.84699		5.78682	-7.73053
9.2646	-0.78942		5.79099	-7.84326
9.27126	-0.7539		5.79515	-8.04016
9.27793	-0.72273		5.79932	-8.29519
9.2846	-0.66379		5.80348	-8.55837
9.29126	-0.59612		5.80765	-8.7603
9.29793	-0.53499		5.81181	-8.83954
9.3046	-0.47516		5.81598	-8.74719
9.31126	-0.43201		5.82014	-8.52366
9.31792	-0.45533		5.82431	-8.28528
9.32459	-0.52096		5.82848	-8.08824
9.33125	-0.58982		5.83264	-7.93474
9.33792	-0.61466		5.83681	-7.8475
9.34459	-0.64127		5.84097	-7.86366
9.35125	-0.71735		5.84514	-7.93743
9.35792	-0.79726		5.8493	-8.01216
9.36458	-0.82887		5.85347	-8.13043
9.37125	-0.80254		5.85764	-8.30023
9.37791	-0.73925		5.8618	-8.42625
9.38457	-0.65143		5.86597	-8.46216
9.39124	-0.54725		5.87013	-8.43174
9.39791	-0.44485		5.8743	-8.32643
9.40457	-0.3784		5.87846	-8.216
9.41124	-0.35293		5.88263	-8.174
9.41791	-0.37047		5.8868	-8.19726
9.42457	-0.42292		5.89096	-8.23845
9.43124	-0.45269		5.89513	-8.25061
9.4379	-0.46195		5.8993	-8.18727
9.44456	-0.46579		5.90346	-8.13856
9.45123	-0.46923		5.90763	-8.2055
9.45789	-0.5025		5.9118	-8.34448
9.46456	-0.52585		5.91596	-8.53178
9.47123	-0.50764		5.92013	-8.75936
9.47789	-0.44122		5.92429	-8.86825
9.48456	-0.34924		5.92846	-8.79628
9.49123	-0.28209		5.93263	-8.68284
9.49789	-0.256		5.93679	-8.55574
9.50456	-0.23272		5.94096	-8.40538
9.51122	-0.1931		5.94512	-8.32799
9.51788	-0.19511		5.94929	-8.31179
9.52455	-0.21284		5.95345	-8.29877
9.53122	-0.25606		5.95762	-8.29308
9.53788	-0.27089		5.96178	-8.329
9.54455	-0.27716		5.96595	-8.41591
9.55121	-0.28243		5.97012	-8.5218
9.55788	-0.23721		5.97428	-8.65632
9.56455	-0.18795		5.97845	-8.78785
9.57121	-0.18314		5.98261	-8.84679
9.57787	-0.23487		5.98678	-8.83829
9.58454	-0.29158		5.99094	-8.83204
9.5912	-0.30485		5.99511	-8.78127
9.59787	-0.26996		5.99927	-8.63349
9.60454	-0.2248		6.00344	-8.49293
9.6112	-0.14962		6.00761	-8.49149
9.61787	-0.05704		6.01177	-8.57332
9.62454	0.01959		6.01594	-8.67378
9.63119	0.09595		6.0201	-8.86752
9.63786	0.14694		6.02427	-9.07808
9.64452	0.16063		6.02844	-9.12368
9.65119	0.14828		6.03261	-9.03732
9.65786	0.10898		6.03677	-8.96432
9.66452	0.08565		6.04094	-8.90525
9.67119	0.05251		6.04511	-8.84504
9.67786	0.01406		6.04927	-8.79253
9.68452	-0.02311		6.05344	-8.73122
9.69118	-0.03059		6.0576	-8.68379
9.69785	0.03869		6.06177	-8.67905
9.70451	0.13186		6.06593	-8.71879
9.71118	0.23056		6.0701	-8.79424
9.71785	0.28751		6.07426	-8.91785
9.72451	0.31004		6.07843	-9.02129
9.73118	0.35662		6.0826	-9.05994
9.73784	0.48104		6.08676	-9.06668
9.74451	0.62351		6.09093	-9.02401
9.75118	0.70589		6.09509	-8.89249
9.75784	0.70401		6.09926	-8.75513
9.7645	0.67571		6.10342	-8.69656
9.77117	0.67303		6.10759	-8.65051
9.77783	0.68814		6.11176	-8.62098
9.7845	0.7484		6.11592	-8.64348
9.79117	0.81027		6.12009	-8.69033
9.79783	0.87405		6.12425	-8.77299
9.8045	0.9437		6.12842	-8.9013
9.81117	1.03556		6.13258	-9.00953
9.81783	1.12965		6.13675	-9.07218
9.82449	1.17283		6.14092	-9.10496
9.83115	1.16949		6.14508	-9.09224
9.83782	1.15136		6.14925	-9.05264
9.84449	1.17145		6.15341	-9.01075
9.85115	1.24818		6.15758	-8.99747
9.85782	1.37141		6.16174	-9.00808
9.86449	1.50966		6.16591	-8.9942
9.87115	1.65359		6.17008	-9.00334
9.87782	1.83594		6.17425	-9.09227
9.88448	2.05261		6.17841	-9.22669
9.89114	2.28481		6.18258	-9.35133
9.89781	2.48009		6.18675	-9.40411
9.90448	2.61718		6.19091	-9.35575
9.91114	2.7297		6.19508	-9.24823
9.91781	2.84165		6.19924	-9.1277
9.92447	2.98766		6.20341	-8.99424
9.93114	3.13956		6.20757	-8.88755
9.9378	3.29363		6.21174	-8.85177
9.94447	3.48507		6.2159	-8.89967
9.95113	3.71478		6.22007	-9.05622
9.9578	3.96104		6.22424	-9.23872
9.96446	4.1978		6.2284	-9.44171
9.97113	4.45399		6.23257	-9.63277
9.9778	4.73802		6.23673	-9.69504
9.98446	5.02353		6.2409	-9.65114
9.99113	5.32231		6.24506	-9.55717
9.9978	5.68348		6.24923	-9.41758
10.0045	6.09962		6.25339	-9.27549
10.0111	6.50115		6.25756	-9.20533
10.0178	6.85181		6.26173	-9.11226
10.0244	7.19212		6.26589	-9.02802
10.0311	7.55646		6.27006	-8.99901
10.0378	7.88827		6.27422	-8.98881
10.0444	8.21261		6.27839	-9.0073
10.0511	8.55844		6.28256	-9.08868
10.0578	8.94553		6.28672	-9.217
10.0645	9.34183		6.29089	-9.36794
10.0711	9.73268		6.29505	-9.53461
10.0778	10.1577		6.29922	-9.61565
10.0844	10.5944		6.30338	-9.53171
10.0911	10.9863		6.30756	-9.37283
10.0978	11.2752		6.31172	-9.21134
10.1044	11.5718		6.31589	-9.04259
10.1111	12.0235		6.32005	-8.91486
10.1178	12.5845		6.32422	-8.89994
10.1244	13.1189		6.32838	-8.93962
10.1311	13.5412		6.33255	-8.99733
10.1378	13.8993		6.33672	-9.11627
10.1444	14.2421		6.34088	-9.26157
10.1511	14.5577		6.34505	-9.37133
10.1578	14.8568		6.34921	-9.41399
10.1644	15.1651		6.35338	-9.38439
10.1711	15.4954		6.35754	-9.26841
10.1778	15.8534		6.36171	-9.11401
10.1844	16.2263		6.36588	-8.9948
10.1911	16.5982		6.37004	-8.93907
10.1977	16.9582		6.37421	-8.89609
10.2044	17.3175		6.37837	-8.85679
10.2111	17.6406		6.38254	-8.85967
10.2178	17.9509		6.3867	-8.86686
10.2244	18.2951		6.39087	-8.88176
10.2311	18.6872		6.39504	-8.94305
10.2378	19.1159		6.3992	-9.02145
10.2444	19.5358		6.40337	-9.09122
10.2511	19.9032		6.40753	-9.14382
10.2577	20.2216		6.4117	-9.14563
10.2644	20.5147		6.41586	-9.08057
10.2711	20.8224		6.42003	-8.96192
10.2777	21.1069		6.42419	-8.84509
10.2844	21.3585		6.42836	-8.76076
10.2911	21.5933		6.43253	-8.69418
10.2977	21.8813		6.43669	-8.65337
10.3044	22.1203		6.44086	-8.66201
10.3111	22.3152		6.44503	-8.71324
10.3177	22.5166		6.4492	-8.80987
10.3244	22.7871		6.45336	-8.95681
10.3311	23.1463		6.45753	-9.10717
10.3377	23.522		6.46169	-9.22262
10.3444	23.8928		6.46586	-9.23432
10.3511	24.2655		6.47002	-9.12162
10.3577	24.6264		6.47419	-8.94508
10.3644	24.9503		6.47836	-8.78458
10.3711	25.1924		6.48252	-8.69804
10.3777	25.3677		6.48669	-8.70342
10.3844	25.5182		6.49085	-8.76611
10.391	25.7208		6.49502	-8.85907
10.3977	25.9497		6.49918	-8.94681
10.4044	26.207		6.50335	-8.96256
10.411	26.4394		6.50751	-8.88754
10.4177	26.6622		6.51168	-8.74167
10.4244	26.9036		6.51585	-8.572
10.431	27.1576		6.52001	-8.44966
10.4377	27.4459		6.52418	-8.35965
10.4444	27.7125		6.52834	-8.30044
10.451	27.9559		6.53251	-8.32415
10.4577	28.1811		6.53667	-8.37282
10.4644	28.4347		6.54084	-8.41014
10.471	28.7337		6.54501	-8.48088
10.4777	29.0724		6.54917	-8.57034
10.4844	29.4251		6.55334	-8.64274
10.491	29.7272		6.5575	-8.70547
10.4977	29.9464		6.56167	-8.71117
10.5044	30.0995		6.56583	-8.66772
10.511	30.2721		6.57	-8.61809
10.5177	30.4965		6.57417	-8.55759
10.5244	30.7579		6.57834	-8.49768
10.531	31.0157		6.5825	-8.44882
10.5377	31.2502		6.58667	-8.38418
10.5443	31.4453		6.59084	-8.29011
10.551	31.5729		6.595	-8.21655
10.5577	31.6999		6.59917	-8.17227
10.5643	31.9193		6.60333	-8.1523
10.571	32.2571		6.6075	-8.18187
10.5777	32.639		6.61166	-8.2987
10.5843	32.9906		6.61583	-8.40851
10.591	33.2978		6.62	-8.45266
10.5977	33.568		6.62416	-8.4487
10.6043	33.8334		6.62833	-8.3983
10.611	34.0906		6.63249	-8.3143
10.6177	34.3706		6.63666	-8.20886
10.6243	34.6365		6.64082	-8.11554
10.631	34.8512		6.64499	-8.06651
10.6377	35.0516		6.64916	-8.02518
10.6443	35.2819		6.65332	-7.96855
10.651	35.5439		6.65749	-8.00634
10.6577	35.8104		6.66165	-8.17038
10.6643	36.0558		6.66582	-8.35285
10.671	36.2619		6.66998	-8.51223
10.6777	36.4424		6.67415	-8.61219
10.6843	36.62		6.67831	-8.57795
10.691	36.8489		6.68248	-8.42793
10.6976	37.1507		6.68665	-8.23014
10.7043	37.4742		6.69081	-8.04788
10.711	37.7919		6.69498	-7.91852
10.7177	38.106		6.69914	-7.84124
10.7243	38.4413		6.70331	-7.79338
10.731	38.742		6.70747	-7.75985
10.7377	38.9922		6.71164	-7.74824
10.7443	39.2525		6.71581	-7.75283
10.751	39.5611		6.71998	-7.76463
10.7576	39.9005		6.72414	-7.77407
10.7643	40.1716		6.72831	-7.77569
10.771	40.3871		6.73248	-7.75336
10.7776	40.5969		6.73664	-7.72533
10.7843	40.816		6.74081	-7.67553
10.791	41.0446		6.74497	-7.60587
10.7976	41.3041		6.74914	-7.57895
10.8043	41.5931		6.7533	-7.58332
10.811	41.896		6.75747	-7.58157
10.8176	42.19		6.76164	-7.58798
10.8243	42.4645		6.7658	-7.61873
10.831	42.7427		6.76997	-7.66218
10.8376	42.9972		6.77413	-7.74371
10.8443	43.2173		6.7783	-7.85559
10.851	43.4509		6.78246	-7.97886
10.8576	43.7226		6.78663	-8.09522
10.8643	44.0309		6.79079	-8.16572
10.871	44.4102		6.79496	-8.14886
10.8776	44.8078		6.79913	-8.05444
10.8843	45.1836		6.80329	-7.91866
10.891	45.4609		6.80746	-7.77673
10.8976	45.708		6.81162	-7.69846
10.9043	46.0281		6.81579	-7.66049
10.9109	46.4045		6.81995	-7.62533
10.9176	46.7573		6.82412	-7.61511
10.9243	47.0568		6.82829	-7.61724
10.9309	47.3266		6.83245	-7.64762
10.9376	47.5527		6.83662	-7.74665
10.9443	47.7647		6.84078	-7.90058
10.9509	48.0378		6.84495	-8.03312
10.9576	48.3517		6.84911	-8.10533
10.9643	48.6752		6.85329	-8.08026
10.9709	48.9313		6.85745	-7.96093
10.9776	49.153		6.86162	-7.84233
10.9843	49.4465		6.86578	-7.77225
10.9909	49.7946		6.86995	-7.73481
10.9976	50.1217		6.87412	-7.72829
11.0043	50.3838		6.87828	-7.76932
11.0109	50.6736		6.88245	-7.80573
11.0176	51.0906		6.88661	-7.83688
11.0243	51.549		6.89078	-7.92859
11.0309	51.962		6.89494	-8.02778
11.0376	52.3139		6.89911	-8.07737
11.0443	52.6289		6.90328	-8.0842
11.0509	52.9294		6.90744	-8.02719
11.0576	53.2074		6.91161	-7.88661
11.0643	53.4977		6.91577	-7.73435
11.0709	53.7732		6.91994	-7.62533
11.0776	54.0281		6.9241	-7.55629
11.0842	54.3048		6.92827	-7.52674
11.0909	54.6005		6.93243	-7.50761
11.0976	54.9242		6.9366	-7.47076
11.1042	55.2366		6.94077	-7.50375
11.1109	55.5414		6.94493	-7.6222
11.1176	55.8927		6.9491	-7.75049
11.1242	56.2715		6.95326	-7.88474
11.1309	56.6415		6.95743	-8.0063
11.1376	57.0017		6.96159	-8.001
11.1442	57.3828		6.96576	-7.87056
11.1509	57.7409		6.96993	-7.72841
11.1576	58.0716		6.97409	-7.61789
11.1642	58.4077		6.97826	-7.53117
11.1709	58.7981		6.98242	-7.46792
11.1776	59.1954		6.98659	-7.43874
11.1842	59.5133		6.99076	-7.43165
11.1909	59.8084		6.99493	-7.4397
11.1976	60.1337		6.99909	-7.4678
11.2042	60.4712		7.00326	-7.51766
11.2109	60.8279		7.00742	-7.62493
11.2175	61.1557		7.01159	-7.75308
11.2242	61.4735		7.01576	-7.83056
11.2309	61.8137		7.01992	-7.82208
11.2376	62.1533		7.02409	-7.7372
11.2442	62.4465		7.02825	-7.57345
11.2509	62.6868		7.03242	-7.41351
11.2576	62.9866		7.03658	-7.31978
11.2642	63.3862		7.04075	-7.26422
11.2709	63.8084		7.04491	-7.27424
11.2775	64.1881		7.04908	-7.31153
11.2842	64.564		7.05325	-7.35084
11.2909	64.995		7.05741	-7.43065
11.2975	65.4391		7.06158	-7.55312
11.3042	65.8219		7.06574	-7.65661
11.3109	66.1987		7.06991	-7.75544
11.3175	66.5859		7.07407	-7.79009
11.3242	66.9576		7.07824	-7.72129
11.3309	67.3079		7.08241	-7.61408
11.3375	67.6476		7.08657	-7.52435
11.3442	68.029		7.09074	-7.44428
11.3509	68.3946		7.0949	-7.37492
11.3575	68.7119		7.09907	-7.30719
11.3642	69.023		7.10323	-7.2451
11.3709	69.3765		7.1074	-7.19859
11.3775	69.721		7.11157	-7.17272
11.3842	70.0388		7.11573	-7.13994
11.3909	70.294		7.1199	-7.13028
11.3975	70.5825		7.12406	-7.11627
11.4042	70.9179		7.12823	-7.0806
11.4108	71.3079		7.1324	-7.0343
11.4175	71.7053		7.13657	-7.02761
11.4242	72.0594		7.14073	-7.05403
11.4308	72.4562		7.1449	-7.12451
11.4375	72.924		7.14906	-7.21369
11.4442	73.411		7.15323	-7.30499
11.4508	73.8287		7.15739	-7.43823
11.4575	74.1809		7.16156	-7.57791
11.4642	74.5472		7.16573	-7.69275
11.4708	74.9745		7.16989	-7.76758
11.4775	75.3816		7.17406	-7.7854
11.4842	75.7461		7.17822	-7.70712
11.4908	76.1015		7.18239	-7.59521
11.4975	76.4327		7.18655	-7.48769
11.5042	76.756		7.19072	-7.37263
11.5108	77.0114		7.19489	-7.26837
11.5175	77.292		7.19905	-7.2297
11.5242	77.6431		7.20322	-7.27836
11.5308	78.0613		7.20738	-7.38655
11.5375	78.4748		7.21155	-7.5634
11.5442	78.8275		7.21571	-7.77776
11.5508	79.1921		7.21988	-7.9451
11.5575	79.6482		7.22404	-8.00128
11.5642	80.1757		7.22821	-7.9783
11.5708	80.6879		7.23238	-7.89902
11.5775	81.1915		7.23654	-7.79988
11.5841	81.677		7.24071	-7.70473
11.5908	82.1436		7.24487	-7.63693
11.5975	82.5497		7.24904	-7.56867
11.6042	82.8906		7.2532	-7.4887
11.6108	83.2358		7.25737	-7.40171
11.6175	83.5904		7.26154	-7.34735
11.6242	83.9736		7.26571	-7.31149
11.6308	84.4216		7.26988	-7.28651
11.6375	84.9661		7.27404	-7.29114
11.6441	85.5628		7.27821	-7.32963
11.6508	86.1215		7.28237	-7.36389
11.6575	86.6366		7.28654	-7.37599
11.6641	87.1576		7.2907	-7.39101
11.6708	87.6799		7.29487	-7.41466
11.6775	88.2197		7.29903	-7.42102
11.6841	88.7996		7.3032	-7.40961
11.6908	89.4289		7.30736	-7.39061
11.6975	90.072		7.31153	-7.37471
11.7041	90.6752		7.3157	-7.37616
11.7108	91.2743		7.31986	-7.41615
11.7175	91.8786		7.32403	-7.49122
11.7241	92.4745		7.32819	-7.62314
11.7308	93.1247		7.33236	-7.80048
11.7375	93.8315		7.33653	-7.97133
11.7441	94.5344		7.34069	-8.07872
11.7508	95.2179		7.34486	-8.09341
11.7575	95.8657		7.34902	-8.03795
11.7641	96.5729		7.35319	-7.92668
11.7708	97.3234		7.35735	-7.82527
11.7774	98.0612		7.36152	-7.75243
11.7841	98.7639		7.36569	-7.68483
11.7908	99.5166		7.36985	-7.61125
11.7974	100.342		7.37402	-7.56133
11.8041	101.217		7.37818	-7.56782
11.8108	102.114		7.38235	-7.68183
11.8174	103.084		7.38651	-7.87146
11.8241	104.123		7.39068	-8.09809
11.8308	105.162		7.39484	-8.31701
11.8374	106.154		7.39902	-8.39854
11.8441	107.166		7.40318	-8.35095
11.8508	108.204		7.40735	-8.2551
11.8574	109.219		7.41151	-8.15861
11.8641	110.269		7.41568	-8.03716
11.8708	111.312		7.41985	-7.96017
11.8774	112.393		7.42401	-7.90434
11.8841	113.517		7.42818	-7.8523
11.8908	114.675		7.43234	-7.79786
11.8974	115.876		7.43651	-7.74825
11.9041	117.101		7.44067	-7.71839
11.9108	118.356		7.44484	-7.72446
11.9174	119.645		7.44901	-7.82409
11.9241	120.983		7.45317	-8.00854
11.9307	122.36		7.45734	-8.21774
11.9374	123.752		7.4615	-8.38807
11.9441	125.108		7.46567	-8.45484
11.9507	126.487		7.46983	-8.38445
11.9574	127.947		7.474	-8.2188
11.9641	129.495		7.47816	-8.06825
11.9707	131.073		7.48233	-8.01865
11.9774	132.693		7.4865	-8.03768
11.9841	134.393		7.49066	-8.04922
11.9907	136.152		7.49483	-8.01696
11.9974	137.898		7.49899	-7.94153
12.0041	139.69		7.50316	-7.90201
12.0107	141.512		7.50732	-8.0068
12.0174	143.371		7.51149	-8.21733
12.0241	145.21		7.51566	-8.46987
12.0307	147.064		7.51982	-8.71634
12.0374	148.945		7.52399	-8.82148
12.0441	150.822		7.52815	-8.75156
12.0507	152.749		7.53232	-8.63276
12.0574	154.737		7.53649	-8.54062
12.0641	156.801		7.54066	-8.45421
12.0707	158.898		7.54482	-8.37267
12.0774	161.085		7.54899	-8.30508
12.084	163.349		7.55315	-8.26988
12.0907	165.613		7.55732	-8.20453
12.0974	167.81		7.56148	-8.11335
12.1041	170.03		7.56565	-8.07653
12.1107	172.421		7.56982	-8.10206
12.1174	174.901		7.57398	-8.13967
12.1241	177.365		7.57815	-8.24122
12.1307	179.822		7.58231	-8.41751
12.1374	182.257		7.58648	-8.61179
12.144	184.721		7.59065	-8.77049
12.1507	187.159		7.59481	-8.81364
12.1574	189.662		7.59898	-8.72338
12.164	192.253		7.60314	-8.57578
12.1707	194.853		7.60731	-8.43864
12.1774	197.481		7.61147	-8.3357
12.184	200.201		7.61564	-8.29373
12.1907	202.975		7.6198	-8.26711
12.1974	205.734		7.62397	-8.23457
12.204	208.423		7.62814	-8.26772
12.2107	211.153		7.6323	-8.4253
12.2174	214.031		7.63647	-8.63682
12.224	216.936		7.64063	-8.86473
12.2307	219.87		7.6448	-9.06934
12.2374	222.885		7.64896	-9.10895
12.244	225.906		7.65313	-8.95242
12.2507	228.834		7.65729	-8.73593
12.2574	231.631		7.66146	-8.54765
12.264	234.427		7.66563	-8.40995
12.2707	237.36		7.66979	-8.33715
12.2774	240.318		7.67397	-8.31879
12.284	243.352		7.67813	-8.35809
12.2907	246.431		7.6823	-8.46974
12.2973	249.526		7.68646	-8.62082
12.304	252.6		7.69063	-8.79005
12.3107	255.647		7.69479	-8.96373
12.3173	258.692		7.69896	-9.09831
12.324	261.786		7.70313	-9.1512
12.3307	264.849		7.70729	-9.11813
12.3373	267.989		7.71146	-9.04835
12.344	271.199		7.71562	-8.92928
12.3507	274.412		7.71979	-8.78508
12.3573	277.613		7.72395	-8.67132
12.364	280.746		7.72812	-8.61193
12.3707	283.879		7.73228	-8.60555
12.3773	287.037		7.73645	-8.68434
12.384	290.184		7.74062	-8.87629
12.3907	293.385		7.74478	-9.07572
12.3973	296.575		7.74895	-9.21107
12.404	299.747		7.75311	-9.22284
12.4107	302.822		7.75728	-9.16607
12.4173	305.79		7.76144	-9.03919
12.424	308.739		7.76561	-8.89149
12.4306	311.761		7.76978	-8.77442
12.4373	314.838		7.77394	-8.72876
12.444	317.978		7.77811	-8.70901
12.4506	321.108		7.78227	-8.71149
12.4573	324.205		7.78644	-8.73078
12.464	327.223		7.7906	-8.8169
12.4706	330.226		7.79477	-8.9426
12.4773	333.196		7.79894	-9.06103
12.484	336.186		7.8031	-9.16192
12.4906	339.201		7.80727	-9.07463
12.4973	342.285		7.81144	-8.96759
12.504	345.337		7.8156	-8.87836
12.5106	348.335		7.81977	-8.70733
12.5173	351.304		7.82394	-8.52496
12.524	354.261		7.8281	-8.42584
12.5306	357.191		7.83227	-8.40314
12.5373	360.135		7.83643	-8.40271
12.544	363.082		7.8406	-8.53551
12.5506	366.021		7.84477	-8.7807
12.5573	368.914		7.84893	-9.03089
12.564	371.689		7.8531	-9.20185
12.5706	374.373		7.85726	-9.2416
12.5773	376.987		7.86143	-9.2367
12.5839	379.596		7.86559	-9.20023
12.5906	382.266		7.86976	-9.12524
12.5973	384.954		7.87392	-9.05055
12.6039	387.651		7.87809	-9.08478
12.6106	390.316		7.88226	-9.15668
12.6173	392.937		7.88642	-9.25641
12.624	395.628		7.89059	-9.39873
12.6306	398.283		7.89475	-9.55933
12.6373	400.886		7.89892	-9.65283
12.6439	403.449		7.90308	-9.64654
12.6506	405.964		7.90725	-9.55098
12.6573	408.46		7.91141	-9.39023
12.6639	410.84		7.91558	-9.2314
12.6706	413.189		7.91975	-9.16246
12.6773	415.517		7.92391	-9.14976
12.6839	417.773		7.92808	-9.18333
12.6906	419.926		7.93224	-9.24748
12.6973	422.021		7.93641	-9.29308
12.7039	424.184		7.94058	-9.34337
12.7106	426.432		7.94474	-9.44669
12.7173	428.7		7.94891	-9.5572
12.7239	430.845		7.95308	-9.64553
12.7306	432.936		7.95725	-9.68265
12.7373	435.08		7.96141	-9.60454
12.7439	437.187		7.96558	-9.46363
12.7506	439.224		7.96974	-9.32224
12.7573	441.158		7.97391	-9.20399
12.7639	443.179		7.97807	-9.12783
12.7706	445.208		7.98224	-9.10752
12.7773	447.146		7.9864	-9.06966
12.7839	448.935		7.99057	-9.05437
12.7906	450.631		7.99474	-9.07788
12.7973	452.278		7.9989	-9.1678
12.8039	453.894		8.00307	-9.2326
12.8106	455.459		8.00723	-9.35389
12.8172	457.079		8.0114	-9.47645
12.8239	458.798		8.01556	-9.52051
12.8306	460.529		8.01973	-9.46755
12.8372	462.162		8.0239	-9.37298
12.8439	463.656		8.02806	-9.23635
12.8506	465.172		8.03223	-9.11178
12.8572	466.765		8.03639	-9.03378
12.8639	468.319		8.04056	-8.97011
12.8706	469.809		8.04472	-8.95763
12.8772	471.174		8.04889	-8.9829
12.8839	472.415		8.05306	-9.03551
12.8906	473.592		8.05722	-9.15244
12.8972	474.764		8.06139	-9.29892
12.9039	475.978		8.06555	-9.44099
12.9106	477.138		8.06972	-9.52645
12.9172	478.25		8.07388	-9.48977
12.9239	479.343		8.07805	-9.34181
12.9306	480.459		8.08221	-9.2176
12.9372	481.54		8.08639	-9.10228
12.9439	482.665		8.09055	-9.0225
12.9505	483.764		8.09472	-9.02665
12.9572	484.849		8.09889	-9.11581
12.9639	485.861		8.10305	-9.21287
12.9705	486.825		8.10722	-9.2938
12.9772	487.738		8.11138	-9.34557
12.9839	488.606		8.11555	-9.31335
12.9905	489.366		8.11971	-9.19409
12.9972	490.046		8.12388	-9.04643
13.0039	490.667		8.12804	-8.95864
13.0105	491.298		8.13221	-8.89144
13.0172	491.945		8.13638	-8.84646
13.0239	492.512		8.14054	-8.85163
13.0305	493.059		8.14471	-8.95013
13.0372	493.699		8.14887	-9.10185
13.0439	494.393		8.15304	-9.26317
13.0505	495.015		8.1572	-9.4291
13.0572	495.543		8.16137	-9.55822
13.0639	496.059		8.16554	-9.5939
13.0705	496.585		8.1697	-9.52014
13.0772	497.078		8.17387	-9.40532
13.0839	497.567		8.17803	-9.31628
13.0905	497.995		8.1822	-9.22561
13.0972	498.316		8.18636	-9.09186
13.1038	498.543		8.19053	-8.94777
13.1105	498.735		8.1947	-8.83611
13.1172	498.919		8.19886	-8.73163
13.1238	499.029		8.20303	-8.62763
13.1305	499.103		8.20719	-8.52829
13.1372	499.215		8.21136	-8.46788
13.1439	499.398		8.21552	-8.43953
13.1505	499.609		8.2197	-8.47793
13.1572	499.793		8.22386	-8.59613
13.1638	499.927		8.22803	-8.81096
13.1705	500.054		8.23219	-9.01531
13.1772	500.166		8.23636	-9.11307
13.1838	500.258		8.24052	-9.07845
13.1905	500.298		8.24469	-8.98365
13.1972	500.241		8.24886	-8.83517
13.2038	500.118		8.25302	-8.6691
13.2105	499.914		8.25719	-8.55619
13.2172	499.706		8.26135	-8.55549
13.2238	499.509		8.26552	-8.57045
13.2305	499.381		8.26968	-8.61277
13.2372	499.228		8.27385	-8.69927
13.2438	498.973		8.27802	-8.79538
13.2505	498.676		8.28218	-8.82667
13.2572	498.415		8.28635	-8.82457
13.2638	498.177		8.29051	-8.77704
13.2705	497.919		8.29468	-8.68694
13.2772	497.62		8.29884	-8.57727
13.2838	497.318		8.30301	-8.51564
13.2905	496.973		8.30718	-8.482
13.2972	496.546		8.31134	-8.4505
13.3038	496.041		8.31551	-8.46571
13.3105	495.513		8.31967	-8.54094
13.3171	494.986		8.32384	-8.52528
13.3238	494.452		8.328	-8.5231
[truncated: 4,003 more rows]
